# Supplementary material for: Reporter system architecture affects measurements of noncanonical amino acid incorporation efficiency and fidelity
Source: Royal Society of Chemistry journal article supplement (doi:10.1039/c9me00107g), 2020-01-01
Supplement: c9me00107g1.pdf [file c9me00107g1.pdf]

## Supporting Information

**Table S1:** Flow cytometry labeling conditions.

| Detection               | Primary label (dilution)  | Secondary label (dilution)                |
|-------------------------|---------------------------|-------------------------------------------|
| HA tag (displaying)     | Mouse anti-HA (1:500)     | Goat anti-mouse Alexa Fluor 488 (1:500)   |
| c-Myc tag (full length) | Chicken anti-CMYC (1:500) | Goat anti-chicken Alexa Fluor 647 (1:500) |

**Table S2:** Relative readthrough efficiency error as a percentage of the RRE magnitude for three reporter systems (yeast display, RFP-GFP dual-fluorescent protein reporter, sfGFP single-fluorescent protein reporter).

|                      | Detection Method | LeuOmeRS + OmeY | LeuOmeRS + AzF | TyrOmeRS + OmeY | TyrOmeRS + AzF |
|----------------------|------------------|-----------------|----------------|-----------------|----------------|
| <b>Yeast Display</b> | Flow Cytometry   | 13%             | 15%            | 17%             | 9.9%           |
| <b>RFP/GFP</b>       | Flow Cytometry   | 5.6%            | 5.3%           | 19%             | 19%            |
| <b>GFP</b>           | Flow Cytometry   | 10%             | 2.3%           | 16%             | 15%            |
| <b>RFP/GFP</b>       | Plate Reader     | 20%             | 40%            | 20%             | 21%            |
| <b>GFP</b>           | Plate Reader     | 19%             | 140%           | 22%             | 19%            |

**Table S3:** Relative readthrough efficiency error as a percentage of the RRE magnitude for various dual-fluorescent protein reporters.

|                | Detection Method | LeuOmeRS + OmeY | LeuOmeRS + AzF | TyrOmeRS + OmeY | TyrOmeRS + AzF |
|----------------|------------------|-----------------|----------------|-----------------|----------------|
| <b>RFP/GFP</b> | Flow Cytometry   | 5.6%            | 5.3%           | 19%             | 19%            |
| <b>BFP/GFP</b> | Flow Cytometry   | 15%             | 13%            | 7.6%            | 7.5%           |
| <b>GFP/BFP</b> | Flow Cytometry   | 43%             | 40%            | 32%             | 28%            |
| <b>RFP/GFP</b> | Plate Reader     | 20%             | 40%            | 20%             | 21%            |
| <b>BFP/GFP</b> | Plate Reader     | 21%             | 24%            | 23%             | 16%            |
| <b>GFP/BFP</b> | Plate Reader     | 37%             | 210%           | 76%             | 73%            |

**Table S4:** One-way ANOVA with groupings via the Games-Howell method to evaluate the abilities of yeast display, RFP-GFP, and sfGFP reporters to discriminate between ncAA incorporation events of varying efficiencies (and wild-type controls) via flow cytometer.

|                      |                      | Flow Cytometry Data |          |        |          |                  |                |        |          |                    |                  |        |          |                   |     |   |       |                |   |
|----------------------|----------------------|---------------------|----------|--------|----------|------------------|----------------|--------|----------|--------------------|------------------|--------|----------|-------------------|-----|---|-------|----------------|---|
|                      |                      | Yeast Display       |          |        |          | RFP-GFP          |                |        |          | GFP                |                  |        |          |                   |     |   |       |                |   |
|                      |                      | N                   | Mean     | 95% CI | Grouping | N                | Mean           | 95% CI | Grouping | N                  | Mean             | 95% CI | Grouping |                   |     |   |       |                |   |
| N-terminal Detection | Wild-type            | LeuOmeRS            | none     | 3      | 1387.4   | (1245.0, 1529.9) | B              | 3      | 989.7    | (899.0, 1080.3)    | A B              |        |          |                   |     |   |       |                |   |
|                      |                      |                     | OmeY     | 3      | 1482.4   | (1259.5, 1705.2) | B              | 3      | 1057.4   | (1007.5, 1107.2)   | A                |        |          |                   |     |   |       |                |   |
|                      |                      |                     | AzF      | 3      | 1478.7   | (1212.4, 1744.9) | B              | 3      | 1065.03  | (1030.13, 1099.94) | A                |        |          |                   |     |   |       |                |   |
|                      |                      | TyrOmeRS            | none     | 3      | 1490.1   | (1399.0, 1581.2) | B              | 3      | 935      | (829.8, 1040.2)    | A B              |        |          |                   |     |   |       |                |   |
|                      |                      |                     | OmeY     | 3      | 1455     | (1222.8, 1687.3) | B              | 3      | 1000     | (984.49, 1015.51)  | A B              |        |          |                   |     |   |       |                |   |
|                      |                      |                     | AzF      | 3      | 1561.3   | (1421.1, 1701.6) | B              | 3      | 1131.3   | (1001.2, 1261.5)   | A                |        |          |                   |     |   |       |                |   |
|                      | TAG construct        | LeuOmeRS            | none     | 3      | 1957.8   | (1858.6, 2057.0) | A B            | 3      | 769.7    | (682.7, 856.7)     | B                |        |          |                   |     |   |       |                |   |
|                      |                      |                     | OmeY     | 3      | 2048     | (1807.8, 2288.2) | A              | 3      | 1073.4   | (952.7, 1194.1)    | A                |        |          |                   |     |   |       |                |   |
|                      |                      |                     | AzF      | 3      | 1980.1   | (1586.1, 2374.1) | A B            | 3      | 905.6    | (838.3, 973.0)     | A B              |        |          |                   |     |   |       |                |   |
|                      |                      | TyrOmeRS            | none     | 3      | 1910.8   | (1786.5, 2035.0) | A B            | 3      | 736.3    | (659.3, 813.4)     | B                |        |          |                   |     |   |       |                |   |
|                      |                      |                     | OmeY     | 3      | 1999     | (1259, 2738)     | A B            | 3      | 947.4    | (809.5, 1085.3)    | A B              |        |          |                   |     |   |       |                |   |
|                      |                      |                     | AzF      | 3      | 2000.4   | (1602.3, 2398.5) | A B            | 3      | 1043.4   | (836.9, 1249.9)    | A B              |        |          |                   |     |   |       |                |   |
|                      | C-terminal Detection | Wild-type           | LeuOmeRS | none   | 3        | 37313            | (33179, 41448) | A      | 3        | 6130               | (5117, 7144)     |        |          |                   | A B | 3 | 26298 | (21618, 30979) | A |
|                      |                      |                     |          | OmeY   | 3        | 35888            | (29681, 42094) | A      | 3        | 6387.7             | (6234.1, 6541.4) |        |          |                   | A   | 3 | 23944 | (20320, 27568) | A |
|                      |                      |                     |          | AzF    | 3        | 33012            | (29357, 36667) | A      | 3        | 6567               | (5895, 7240)     |        |          |                   | A   | 3 | 25777 | (24503, 27051) | A |
|                      |                      |                     | TyrOmeRS | none   | 3        | 32599            | (30400, 34798) | A      | 3        | 5961               | (5074, 6848)     |        |          |                   | A B | 3 | 27279 | (20285, 34272) | A |
|                      |                      |                     |          | OmeY   | 3        | 34140            | (29721, 38560) | A      | 3        | 6283               | (5866.1, 6699.9) |        |          |                   | A   | 3 | 22298 | (15125, 29471) | A |
|                      |                      |                     |          | AzF    | 3        | 34697            | (31573, 37821) | A      | 3        | 6708               | (5759, 7657)     |        |          |                   | A   | 3 | 26485 | (18567, 34404) | A |
| TAG construct        |                      | LeuOmeRS            | none     | 3      | 286.7    | (239.4, 334.0)   | F              | 3      | 81.63    | (75.97, 87.30)     | E                | 3      | 889.3    | (711.2, 1067.5)   | D   |   |       |                |   |
|                      |                      |                     | OmeY     | 3      | 16375    | (13417, 19333)   | B              | 3      | 4164.7   | (3894.5, 4435.0)   | B C              | 3      | 5439     | (4317, 6561)      | B   |   |       |                |   |
|                      |                      |                     | AzF      | 3      | 1051.3   | (794.6, 1308.1)  | C              | 3      | 442.67   | (434.91, 450.42)   | D E              | 3      | 989      | (957.87, 1020.13) | D   |   |       |                |   |
|                      |                      | TyrOmeRS            | none     | 3      | 364.7    | (337.11, 392.29) | F              | 3      | 132.37   | (98.69, 166.05)    | E                | 3      | 1235.7   | (999.6, 1471.8)   | D   |   |       |                |   |
|                      |                      |                     | OmeY     | 3      | 5269.3   | (4844.2, 5694.4) | D              | 3      | 2398     | (1346, 3450)       | C D E            | 3      | 2782     | (2180, 3384)      | C   |   |       |                |   |
|                      |                      |                     | AzF      | 3      | 7211     | (6701, 7722)     | E              | 3      | 2742     | (1698, 3785)       | C D              | 3      | 3176     | (2535, 3818)      | C   |   |       |                |   |

\*Means that do not share a letter are statistically different

**Table S5:** One-way ANOVA with groupings via the Games-Howell method to evaluate the abilities of RFP-GFP, and sfGFP reporters to discriminate between ncAA incorporation events of varying efficiencies (and wild-type controls) via microplate reader.

|                      |               | Microplate Reader Data |          |        |          |                      |                    |        |          |                      |                    |   |
|----------------------|---------------|------------------------|----------|--------|----------|----------------------|--------------------|--------|----------|----------------------|--------------------|---|
|                      |               | RFP-GFP                |          |        |          | GFP                  |                    |        |          |                      |                    |   |
|                      |               | N                      | Mean     | 95% CI | Grouping | N                    | Mean               | 95% CI | Grouping |                      |                    |   |
| N-terminal Detection | Wild-type     | LeuOmeRS               | none     | 3      | 620515   | (495173, 745857)     | A B                |        |          |                      |                    |   |
|                      |               |                        | OmeY     | 3      | 641626   | (540257, 742996)     | A                  |        |          |                      |                    |   |
|                      |               |                        | AzF      | 3      | 599362   | (572771, 625954)     | A B                |        |          |                      |                    |   |
|                      |               | TyrOmeRS               | none     | 3      | 604032   | (493554, 714509)     | A B                |        |          |                      |                    |   |
|                      |               |                        | OmeY     | 3      | 551924   | (465708, 638139)     | A B                |        |          |                      |                    |   |
|                      |               |                        | AzF      | 3      | 562679   | (459852, 665507)     | A B                |        |          |                      |                    |   |
|                      | TAG construct | LeuOmeRS               | none     | 3      | 448974   | (407652, 490296)     | A B                |        |          |                      |                    |   |
|                      |               |                        | OmeY     | 3      | 536657   | (499394, 573920)     | A B                |        |          |                      |                    |   |
|                      |               |                        | AzF      | 3      | 416156   | (368893, 463418)     | B                  |        |          |                      |                    |   |
|                      |               | TyrOmeRS               | none     | 3      | 408299   | (342151, 474448)     | B                  |        |          |                      |                    |   |
|                      |               |                        | OmeY     | 3      | 456924   | (399847, 514000)     | B                  |        |          |                      |                    |   |
|                      |               |                        | AzF      | 3      | 510425   | (440547, 580303)     | A B                |        |          |                      |                    |   |
| C-terminal Detection | Wild-type     | LeuOmeRS               | none     | 3      | 12391834 | (9043994, 15739675)  | A                  | 3      | 24060972 | (18929613, 29192331) | A                  |   |
|                      |               |                        | OmeY     | 3      | 11578707 | (8755388, 14402026)  | A                  | 3      | 21723180 | (15872683, 27573676) | A                  |   |
|                      |               |                        | AzF      | 3      | 11362153 | (10072694, 12651611) | A                  | 3      | 22826754 | (19084945, 26568563) | A                  |   |
|                      |               | TyrOmeRS               | none     | 3      | 11068101 | (9600508, 12535694)  | A                  | 3      | 23105251 | (17436634, 28773869) | A                  |   |
|                      |               |                        | OmeY     | 3      | 9827196  | (8133696, 11520696)  | A                  | 3      | 19059034 | (14429691, 23688377) | A                  |   |
|                      |               |                        | AzF      | 3      | 10088130 | (7772110, 12404150)  | A                  | 3      | 20887844 | (14552549, 27223139) | A                  |   |
|                      |               | TAG construct          | LeuOmeRS | none   | 3        | 60903                | (-584984, 706790)  | C      | 3        | 200056               | (-472961, 873073)  | C |
|                      |               |                        |          | OmeY   | 3        | 7974976              | (6850592, 9099361) | A      | 3        | 4018956              | (2379751, 5658161) | B |
|                      |               |                        |          | AzF    | 3        | 822572               | (116018, 1529127)  | C      | 3        | 218640               | (-574756, 1012035) | C |
|                      | TyrOmeRS      |                        | none     | 3      | 539344   | (-528534, 1607221)   | C                  | 3      | 236415   | (-853429, 1326258)   | C                  |   |
|                      |               |                        | OmeY     | 3      | 4632104  | (3744436, 5519773)   | B                  | 3      | 1852495  | (589714, 3115277)    | B C                |   |
|                      |               |                        | AzF      | 3      | 5688804  | (4815829, 6561779)   | A B                | 3      | 2348903  | (1061853, 3635953)   | B C                |   |

\*Means that do not share a letter are statistically different

**Table S6:** One-way ANOVA with groupings via the Games-Howell method to evaluate the abilities of RFP-GFP, BFP-GFP, and GFP-BFP reporters to discriminate between ncAA incorporation events of varying efficiencies (and wild-type controls) via flow cytometry.

|                      |               | Flow Cytometry Data |      |        |          |                    |       |        |          |                   |         |        |          |                  |   |
|----------------------|---------------|---------------------|------|--------|----------|--------------------|-------|--------|----------|-------------------|---------|--------|----------|------------------|---|
|                      |               | RFP-GFP             |      |        |          | BFP-GFP            |       |        |          | GFP-BFP           |         |        |          |                  |   |
|                      |               | N                   | Mean | 95% CI | Grouping | N                  | Mean  | 95% CI | Grouping | N                 | Mean    | 95% CI | Grouping |                  |   |
| N-terminal Detection | Wild-type     | LeuOmeRS            | none | 3      | 989.7    | (899.0, 1080.3)    | A B   | 3      | 8453     | (7561, 9344)      | D       | 3      | 23632    | (16754, 30511)   | A |
|                      |               |                     | OmeY | 3      | 1057.4   | (1007.5, 1107.2)   | A     | 3      | 9834     | (9239, 10430)     | C D     | 3      | 24920    | (16531, 33310)   | A |
|                      |               |                     | AzF  | 3      | 1065.03  | (1030.13, 1099.94) | A     | 3      | 10832    | (9780, 11883)     | B C D   | 3      | 26129    | (19447, 32811)   | A |
|                      |               | TyrOmeRS            | none | 3      | 935      | (829.8, 1040.2)    | A B   | 3      | 9321     | (8129, 10513)     | D       | 3      | 23859    | (16159, 31558)   | A |
|                      |               |                     | OmeY | 3      | 1000     | (984.49, 1015.51)  | A B   | 3      | 9838     | (9414.9, 10261.1) | C D     | 3      | 24344    | (15180, 33508)   | A |
|                      |               |                     | AzF  | 3      | 1131.3   | (1001.2, 1261.5)   | A     | 3      | 11855    | (10687, 13022)    | A B C   | 3      | 26838    | (14979, 38697)   | A |
|                      | TAG construct | LeuOmeRS            | none | 3      | 769.7    | (682.7, 856.7)     | B     | 3      | 7928     | (7164, 8692)      | D       | 3      | 13485    | (4711, 22259)    | A |
|                      |               |                     | OmeY | 3      | 1073.4   | (952.7, 1194.1)    | A     | 3      | 11503    | (8443, 14564)     | A B C D | 3      | 21830    | (8365, 35295)    | A |
|                      |               |                     | AzF  | 3      | 905.6    | (838.3, 973.0)     | A B   | 3      | 11293    | (9429, 13158)     | A B C D | 3      | 15487    | (5238, 25735)    | A |
|                      |               | TyrOmeRS            | none | 3      | 736.3    | (659.3, 813.4)     | B     | 3      | 9239     | (7961, 10518)     | D       | 3      | 14220    | (11462, 16977)   | A |
|                      |               |                     | OmeY | 3      | 947.4    | (809.5, 1085.3)    | A B   | 3      | 12459    | (11870, 13048)    | A B     | 3      | 17990    | (11661, 24319)   | A |
|                      |               |                     | AzF  | 3      | 1043.4   | (836.9, 1249.9)    | A B   | 3      | 13509    | (12608, 14410)    | A       | 3      | 22706    | (18576, 26836)   | A |
| C-terminal Detection | Wild-type     | LeuOmeRS            | none | 3      | 6130     | (5117, 7144)       | A B   | 3      | 10373    | (9264, 11481)     | C D     | 3      | 26409    | (17137, 35682)   | A |
|                      |               |                     | OmeY | 3      | 6387.7   | (6234.1, 6541.4)   | A     | 3      | 12425    | (11980, 12870)    | A B C   | 3      | 28690    | (16785, 40595)   | A |
|                      |               |                     | AzF  | 3      | 6567     | (5895, 7240)       | A     | 3      | 13463    | (12322, 14603)    | A B     | 3      | 29783    | (21053, 38512)   | A |
|                      |               | TyrOmeRS            | none | 3      | 5961     | (5074, 6848)       | A B   | 3      | 11812    | (10432, 13192)    | B C     | 3      | 27057    | (18320, 35794)   | A |
|                      |               |                     | OmeY | 3      | 6283     | (5866.1, 6699.9)   | A     | 3      | 12457    | (11927, 12987)    | A B     | 3      | 27824    | (16820, 38828)   | A |
|                      |               |                     | AzF  | 3      | 6708     | (5759, 7657)       | A     | 3      | 15115    | (13764, 16466)    | A       | 3      | 30569    | (17001, 44136)   | A |
|                      | TAG construct | LeuOmeRS            | none | 3      | 81.63    | (75.97, 87.30)     | E     | 3      | 67.67    | (59.08, 76.25)    | H       | 3      | 248.3    | (78.2, 418.5)    | A |
|                      |               |                     | OmeY | 3      | 4164.7   | (3894.5, 4435.0)   | B C   | 3      | 7625     | (5776, 9474)      | D E     | 3      | 8668     | (2790, 14546)    | A |
|                      |               |                     | AzF  | 3      | 442.67   | (434.91, 450.42)   | D E   | 3      | 721.8    | (550.2, 893.3)    | F       | 3      | 537      | (197.1, 876.9)   | A |
|                      |               | TyrOmeRS            | none | 3      | 132.37   | (98.69, 166.05)    | E     | 3      | 118.07   | (109.53, 126.60)  | G       | 3      | 373      | (341.87, 404.13) | A |
|                      |               |                     | OmeY | 3      | 2398     | (1346, 3450)       | C D E | 3      | 4262     | (3531, 4993)      | E       | 3      | 3544     | (1921, 5167)     | A |
|                      |               |                     | AzF  | 3      | 2742     | (1698, 3785)       | C D   | 3      | 5370     | (4764, 5976)      | E       | 3      | 5189     | (3970, 6407)     | A |

\*Means that do not share a letter are statistically different

**Table S7:** One-way ANOVA with groupings via the Games-Howell method to evaluate the reproducibility of GFP-BFP reporter performance via flow cytometry.

|                      |               | Flow Cytometry Data (Reproduced) |          |        |          |                |               |     |
|----------------------|---------------|----------------------------------|----------|--------|----------|----------------|---------------|-----|
|                      |               | GFP-BFP                          |          |        |          |                |               |     |
|                      |               | N                                | Mean     | 95% CI | Grouping |                |               |     |
| N-terminal Detection | Wild-type     | LeuOmeRS                         | none     | 3      | 26344    | (18397, 34292) | A B           |     |
|                      |               |                                  | OmeY     | 3      | 22921    | (16210, 29631) | A B           |     |
|                      |               |                                  | AzF      | 3      | 28675    | (20598, 36752) | A             |     |
|                      |               | TyrOmeRS                         | none     | 3      | 27610    | (18311, 36909) | A B           |     |
|                      |               |                                  | OmeY     | 3      | 21320    | (14482, 28158) | A B           |     |
|                      |               |                                  | AzF      | 3      | 26979    | (15720, 38238) | A B           |     |
|                      | TAG construct | LeuOmeRS                         | none     | 3      | 14585    | (5345, 23826)  | A B           |     |
|                      |               |                                  | OmeY     | 3      | 22040    | (7072, 37009)  | A B           |     |
|                      |               |                                  | AzF      | 3      | 17315    | (6307, 28323)  | A B           |     |
|                      |               | TyrOmeRS                         | none     | 3      | 14372    | (8887, 19857)  | B             |     |
|                      |               |                                  | OmeY     | 3      | 16170    | (11584, 20757) | A B           |     |
|                      |               |                                  | AzF      | 3      | 20171    | (13699, 26643) | A B           |     |
| C-terminal Detection | Wild-type     | LeuOmeRS                         | none     | 3      | 28140    | (17329, 38950) | A             |     |
|                      |               |                                  | OmeY     | 3      | 25217    | (16396, 34038) | A B           |     |
|                      |               |                                  | AzF      | 3      | 30921    | (21265, 40578) | A             |     |
|                      |               | TyrOmeRS                         | none     | 3      | 30120    | (20438, 39801) | A B           |     |
|                      |               |                                  | OmeY     | 3      | 23831    | (16921, 30741) | A B           |     |
|                      |               |                                  | AzF      | 3      | 29901    | (17745, 42057) | A B           |     |
|                      |               | TAG construct                    | LeuOmeRS | none   | 3        | 280.7          | (38.7, 522.6) | C   |
|                      |               |                                  |          | OmeY   | 3        | 9617           | (955, 18279)  | B C |
|                      |               |                                  |          | AzF    | 3        | 640            | (198, 1082)   | B C |
|                      | TyrOmeRS      |                                  | none     | 3      | 406.7    | (246.4, 566.9) | C             |     |
|                      |               |                                  | OmeY     | 3      | 3387     | (1558, 5217)   | B C           |     |
|                      |               |                                  | AzF      | 3      | 4814     | (1778, 7858)   | B C           |     |

\*Means that do not share a letter are statistically different

**Table S8:** One-way ANOVA with groupings via the Games-Howell method to evaluate the abilities of RFP-GFP, BFP-GFP, and GFP-BFP reporters to discriminate between ncAA incorporation events of varying efficiencies (and wild-type controls) via microplate reader.

|                      |                      | Microplate Reader Data |          |        |          |                    |                      |        |          |                      |                      |        |          |                      |                     |     |
|----------------------|----------------------|------------------------|----------|--------|----------|--------------------|----------------------|--------|----------|----------------------|----------------------|--------|----------|----------------------|---------------------|-----|
|                      |                      | RFP-GFP                |          |        |          | BFP-GFP            |                      |        |          | GFP-BFP              |                      |        |          |                      |                     |     |
|                      |                      | N                      | Mean     | 95% CI | Grouping | N                  | Mean                 | 95% CI | Grouping | N                    | Mean                 | 95% CI | Grouping |                      |                     |     |
| N-terminal Detection | Wild-type            | LeuOmeRS               | none     | 3      | 620515   | (495173, 745857)   | A B                  | 3      | 10706239 | (9752387, 11660091)  | A                    | 3      | 23540322 | (16520045, 30560599) | A                   |     |
|                      |                      |                        | OmeY     | 3      | 641626   | (540257, 742996)   | A                    | 3      | 9465516  | (7432078, 11498954)  | A                    | 3      | 20651655 | (15130827, 26172483) | A                   |     |
|                      |                      |                        | AzF      | 3      | 599362   | (572771, 625954)   | A B                  | 3      | 10359836 | (10059445, 10660226) | A                    | 3      | 23771617 | (16215718, 31327516) | A                   |     |
|                      |                      | TyrOmeRS               | none     | 3      | 604032   | (493554, 714509)   | A B                  | 3      | 9462927  | (7113018, 11812837)  | A                    | 3      | 22105138 | (16745600, 27464676) | A                   |     |
|                      |                      |                        | OmeY     | 3      | 551924   | (465708, 638139)   | A B                  | 3      | 8713931  | (7409970, 10017892)  | A                    | 3      | 17089913 | (12041813, 22138014) | A                   |     |
|                      |                      |                        | AzF      | 3      | 562679   | (459852, 665507)   | A B                  | 3      | 10377311 | (9403552, 11351069)  | A                    | 3      | 20376906 | (14440720, 26313092) | A                   |     |
|                      | TAG construct        | LeuOmeRS               | none     | 3      | 448974   | (407652, 490296)   | A B                  | 3      | 10394040 | (9394451, 11393629)  | A                    | 3      | 12494469 | (3993947, 20994991)  | A                   |     |
|                      |                      |                        | OmeY     | 3      | 536657   | (499394, 573920)   | A B                  | 3      | 9012477  | (7689337, 10335617)  | A                    | 3      | 16670226 | (10682510, 22657942) | A                   |     |
|                      |                      |                        | AzF      | 3      | 416156   | (368893, 463418)   | B                    | 3      | 10568754 | (7730818, 13406689)  | A                    | 3      | 13538609 | (5128754, 21948464)  | A                   |     |
|                      |                      | TyrOmeRS               | none     | 3      | 408299   | (342151, 474448)   | B                    | 3      | 12620939 | (10422772, 14819105) | A                    | 3      | 12420048 | (10639622, 14200474) | A                   |     |
|                      |                      |                        | OmeY     | 3      | 456924   | (399847, 514000)   | B                    | 3      | 11164627 | (7953631, 14375624)  | A                    | 3      | 14311679 | (9829997, 18793361)  | A                   |     |
|                      |                      |                        | AzF      | 3      | 510425   | (440547, 580303)   | A B                  | 3      | 13538616 | (10504511, 16572720) | A                    | 3      | 15777682 | (12070723, 19484641) | A                   |     |
|                      | C-terminal Detection | Wild-type              | LeuOmeRS | none   | 3        | 12391834           | (9043994, 15739675)  | A      | 3        | 29926249             | (23143138, 36709359) | A      | 3        | 7755078              | (4678883, 10831273) | A   |
|                      |                      |                        |          | OmeY   | 3        | 11578707           | (8755388, 14402026)  | A      | 3        | 24820691             | (17492926, 32148456) | A B C  | 3        | 7444236              | (4082222, 10806249) | A B |
|                      |                      |                        |          | AzF    | 3        | 11362153           | (10072694, 12651611) | A      | 3        | 28910583             | (24958136, 32863030) | A      | 3        | 7703980              | (3707880, 11700080) | A B |
|                      |                      |                        | TyrOmeRS | none   | 3        | 11068101           | (9600508, 12535694)  | A      | 3        | 25228671             | (18846129, 31611212) | A B    | 3        | 7315088              | (5959395, 8670781)  | A B |
|                      |                      |                        |          | OmeY   | 3        | 9827196            | (8133696, 11520696)  | A      | 3        | 23068601             | (18084324, 28052878) | A B C  | 3        | 6022844              | (3593073, 8452614)  | A B |
|                      |                      |                        |          | AzF    | 3        | 10088130           | (7772110, 12404150)  | A      | 3        | 29334925             | (24602574, 34067275) | A      | 3        | 6928395              | (5272844, 8583946)  | A B |
| TAG construct        |                      | LeuOmeRS               | none     | 3      | 60903    | (-584984, 706790)  | C                    | 3      | 65172    | (-605078, 735422)    | E                    | 3      | -337784  | (-1978503, 1302934)  | C                   |     |
|                      |                      |                        | OmeY     | 3      | 7974976  | (6850592, 9099361) | A                    | 3      | 14015849 | (13021805, 15009893) | B C                  | 3      | 2680573  | (-113144, 5474290)   | A B C               |     |
|                      |                      |                        | AzF      | 3      | 822572   | (116018, 1529127)  | C                    | 3      | 1599123  | (886230, 2312017)    | D                    | 3      | -347913  | (-2411930, 1716103)  | C                   |     |
|                      |                      | TyrOmeRS               | none     | 3      | 539344   | (-528534, 1607221) | C                    | 3      | 834882   | (-188738, 1858502)   | D E                  | 3      | -349264  | (-3289472, 2590944)  | C                   |     |
|                      |                      |                        | OmeY     | 3      | 4632104  | (3744436, 5519773) | B                    | 3      | 11426749 | ( 9123118, 13730380) | C                    | 3      | 1664856  | (-1183091, 4512802)  | B C                 |     |
|                      |                      |                        | AzF      | 3      | 5688804  | (4815829, 6561779) | A B                  | 3      | 15241406 | (12980846, 17501966) | B C                  | 3      | 1350448  | (-787925, 3488820)   | B C                 |     |

\*Means that do not share a letter are statistically different

**Table S9:** One-way ANOVA with groupings via the Games-Howell method to evaluate the extent to which BFP-GFP reporters (BXG, AltTAG, AltTAG2, AltTAG3, AltTAG4 and 2TAG) support statistically distinct levels of readthrough efficiency via flow cytometry.

|         |                      | Flow Cytometry Data |      |        |                  |          |      |        |                 |     |
|---------|----------------------|---------------------|------|--------|------------------|----------|------|--------|-----------------|-----|
|         |                      | LeuOmeRS            |      |        |                  | TyrOmeRS |      |        |                 |     |
|         |                      | N                   | Mean | 95% CI | Grouping         | N        | Mean | 95% CI | Grouping        |     |
| No nCAA | N-terminal Detection | BYG                 | 3    | 35410  | (28853, 41966)   | A        | 3    | 36976  | (25386, 48566)  | A   |
|         |                      | BXG                 | 3    | 32982  | (30406, 35557)   | A        | 3    | 34838  | (32898, 36778)  | A   |
|         |                      | AltTAG              | 3    | 32253  | (23368, 41138)   | A        | 3    | 32674  | (27699, 37648)  | A   |
|         |                      | AltTAG2             | 3    | 29952  | (20449, 39454)   | A        | 3    | 34036  | (16091, 51981)  | A   |
|         |                      | AltTAG3             | 3    | 35486  | (33197, 37775)   | A        | 3    | 35193  | (34398, 35987)  | A   |
|         |                      | AltTAG4             | 3    | 28782  | (27938, 29626)   | A        | 3    | 31288  | (26073, 36503)  | A   |
|         |                      | 2TAG                | 3    | 35734  | (16441, 55026)   | A        | 3    | 31198  | (10004, 52391)  | A   |
|         | C-terminal Detection | BYG                 | 3    | 31684  | (25184, 38185)   | A        | 3    | 31773  | (19448, 44097)  | A   |
|         |                      | BXG                 | 3    | 185    | (169.49, 200.51) | B        | 3    | 293    | (233.4, 352.6)  | B   |
|         |                      | AltTAG              | 3    | 47.67  | (35.93, 59.41)   | D        | 3    | 94.3   | (36.1, 152.6)   | C D |
|         |                      | AltTAG2             | 3    | 46     | (39.43, 52.57)   | D        | 3    | 107.7  | (56.5, 158.8)   | C D |
|         |                      | AltTAG3             | 3    | 74.67  | (68.42, 80.92)   | C        | 3    | 135    | (93.96, 176.04) | C   |
|         |                      | AltTAG4             | 3    | 48.33  | (33.78, 62.89)   | D        | 3    | 88.67  | (73.49, 103.84) | C D |
|         |                      | 2TAG                | 3    | 23     | (-3.29, 49.29)   | D        | 3    | 38     | (10.01, 65.99)  | D   |
| OmeY    | N-terminal Detection | BYG                 | 3    | 29430  | (17375, 41485)   | A        | 3    | 30031  | (17723, 42338)  | A   |
|         |                      | BXG                 | 3    | 33571  | (24603, 42539)   | A        | 3    | 37602  | (22552, 52653)  | A   |
|         |                      | AltTAG              | 3    | 36803  | (27473, 46133)   | A        | 3    | 36408  | (24832, 47985)  | A   |
|         |                      | AltTAG2             | 3    | 23112  | (13957, 32266)   | A        | 3    | 23644  | (8904, 38383)   | A   |
|         |                      | AltTAG3             | 3    | 35684  | (15805, 55563)   | A        | 3    | 28243  | (331, 56156)    | A   |
|         |                      | AltTAG4             | 3    | 34288  | (25401, 43175)   | A        | 3    | 36803  | (17590, 56016)  | A   |
|         |                      | 2TAG                | 3    | 51350  | (28332, 74369)   | A        | 3    | 39453  | (36987, 41920)  | A   |
|         | C-terminal Detection | BYG                 | 3    | 25853  | (14719, 36987)   | A        | 3    | 26186  | (13388, 38984)  | A   |
|         |                      | BXG                 | 3    | 14699  | (9869, 19528)    | A        | 3    | 9237   | (3810, 14664)   | A   |
|         |                      | AltTAG              | 3    | 3835   | (2985, 4684)     | A B      | 3    | 1940   | (525, 3355)     | A   |
|         |                      | AltTAG2             | 3    | 2118   | (1201, 3035)     | B        | 3    | 1208   | (327, 2089)     | A   |
|         |                      | AltTAG3             | 3    | 5580   | (1631, 9530)     | B        | 3    | 1782   | (-300, 3865)    | A   |
|         |                      | AltTAG4             | 3    | 1873   | (669, 3077)      | B        | 3    | 1473   | (528, 2419)     | A   |
|         |                      | 2TAG                | 3    | 3130   | (1853, 4407)     | B        | 3    | 593    | (498.5, 687.5)  | A   |
| AzF     | N-terminal Detection | BYG                 | 3    | 39138  | (34517, 43758)   | A        | 3    | 37525  | (28872, 46179)  | A   |
|         |                      | BXG                 | 3    | 41435  | (40534, 42336)   | A        | 3    | 45489  | (42796, 48182)  | A   |
|         |                      | AltTAG              | 3    | 22375  | (18923, 25827)   | A        | 3    | 24541  | (-721, 49803)   | A   |
|         |                      | AltTAG2             | 3    | 22286  | (19577, 24995)   | A        | 3    | 25846  | (258, 51434)    | A   |
|         |                      | AltTAG3             | 3    | 42395  | (28499, 56291)   | A        | 3    | 48993  | (38879, 59108)  | A   |
|         |                      | AltTAG4             | 3    | 35931  | (28629, 43234)   | A        | 3    | 43624  | (38284, 48963)  | A   |
|         |                      | 2TAG                | 3    | 44608  | (27757, 61459)   | A        | 3    | 43144  | (42011, 44277)  | A   |
|         | C-terminal Detection | BYG                 | 3    | 35625  | (31667, 39583)   | A        | 3    | 33520  | (25299, 41741)  | A   |
|         |                      | BXG                 | 3    | 1475.7 | (1298.4, 1652.9) | B        | 3    | 12357  | (11299, 13415)  | B   |
|         |                      | AltTAG              | 3    | 137    | (108.79, 165.21) | C        | 3    | 1277   | (-208, 2762)    | C   |
|         |                      | AltTAG2             | 3    | 128.33 | (114.21, 142.46) | C        | 3    | 1492   | (-626, 3609)    | C   |
|         |                      | AltTAG3             | 3    | 297.3  | (180.4, 414.2)   | C        | 3    | 3763   | (1513, 6012)    | C   |
|         |                      | AltTAG4             | 3    | 113.67 | (95.02, 132.31)  | C        | 3    | 1923   | (1483, 2363)    | C   |
|         |                      | 2TAG                | 3    | 46.67  | (17.66, 75.67)   | D        | 3    | 761.7  | (686.4, 836.9)  | C   |

\*Means that do not share a letter are statistically different

**Table S10:** One-way ANOVA with groupings via the Games-Howell method to evaluate the varying expression levels of N-terminal detection for the alternate BFP-GFP reporter (AltTAG) with various BY4741 single gene knockout strains via flow cytometry.

| Flow Cytometry Data: BFP-GFP (AltTAG) |                      |          |      |        |                |          |      |         |                  |     |
|---------------------------------------|----------------------|----------|------|--------|----------------|----------|------|---------|------------------|-----|
|                                       |                      | LeuOmeRS |      |        |                | TyrOmeRS |      |         |                  |     |
|                                       |                      | N        | Mean | 95% CI | Grouping       | N        | Mean | 95% CI  | Grouping         |     |
| No nAAA                               | N-terminal Detection | BY4741   | 3    | 20239  | (19287, 21190) | B        | 3    | 19346   | (17190, 21502)   | C   |
|                                       |                      | ΔUPF1    | 3    | 40479  | (37804, 43154) | A        | 3    | 38690   | (37595, 39786)   | A   |
|                                       |                      | ΔUPF2    | 3    | 39594  | (36600, 42588) | A        | 3    | 33113   | (29700, 36526)   | A B |
|                                       |                      | ΔUPF3    | 3    | 40374  | (36251, 44497) | A        | 3    | 33305   | (29718, 36893)   | A B |
|                                       |                      | ΔTPA1    | 3    | 21897  | (19478, 24316) | B        | 3    | 20437   | (17900, 22975)   | C   |
|                                       |                      | ΔPOP2    | 3    | 24063  | (20822, 27305) | B        | 3    | 21875   | (19179, 24572)   | C   |
|                                       |                      | ΔPPQ1    | 3    | 24012  | (21109, 26915) | B        | 3    | 30654   | (27219, 34089)   | B   |
| OmeY                                  | N-terminal Detection | BY4741   | 3    | 23193  | (21566, 24819) | B        | 3    | 22976   | (19225, 26727)   | E   |
|                                       |                      | ΔUPF1    | 3    | 36904  | (35454, 38354) | A        | 3    | 37447   | (35215, 39679)   | B   |
|                                       |                      | ΔUPF2    | 3    | 33000  | (25865, 40136) | A B      | 3    | 32290   | (30556, 34024)   | C   |
|                                       |                      | ΔUPF3    | 3    | 34451  | (31500, 37403) | A        | 3    | 30343   | (27617, 33069)   | C D |
|                                       |                      | ΔTPA1    | 3    | 28704  | (26088, 31321) | B        | 3    | 28496   | (27016, 29977)   | D E |
|                                       |                      | ΔPOP2    | 3    | 28452  | (22806, 34098) | A B      | 3    | 30567   | (26390, 34744)   | C D |
|                                       |                      | ΔPPQ1    | 3    | 34090  | (24392, 43787) | A B      | 3    | 45845   | (45069, 46621)   | A   |
| AzF                                   | N-terminal Detection | BY4741   | 3    | 20931  | (19306, 22557) | B        | 3    | 25622.7 | (25370, 25875.3) | C   |
|                                       |                      | ΔUPF1    | 3    | 40284  | (31910, 48657) | A        | 3    | 36715   | (31307, 42123)   | A B |
|                                       |                      | ΔUPF2    | 3    | 40705  | (33263, 48147) | A        | 3    | 33747   | (32825, 34669)   | B   |
|                                       |                      | ΔUPF3    | 3    | 40226  | (38691, 41760) | A        | 3    | 32040   | (29326, 34754)   | B   |
|                                       |                      | ΔTPA1    | 3    | 23228  | (20242, 26213) | B        | 3    | 30653   | (29433, 31873)   | B   |
|                                       |                      | ΔPOP2    | 3    | 24579  | (21869, 27288) | B        | 3    | 30078   | (23062, 37095)   | B C |
|                                       |                      | ΔPPQ1    | 3    | 25138  | (20239, 30038) | B        | 3    | 46198   | (45283, 47112)   | A   |

*\*Means that do not share a letter are statistically different*



**Table S11:** One-way ANOVA with groupings via the Games-Howell method to evaluate the varying expression levels of N-terminal detection for the BFP-GFP reporter (BXG) with various BY4741 single gene knockout strains via flow cytometry.

|         |                      | Flow Cytometry Data: BFP-GFP (BXG) |      |        |                |          |      |        |                 |         |
|---------|----------------------|------------------------------------|------|--------|----------------|----------|------|--------|-----------------|---------|
|         |                      | LeuOmeRS                           |      |        |                | TyrOmeRS |      |        |                 |         |
|         |                      | N                                  | Mean | 95% CI | Grouping       | N        | Mean | 95% CI | Grouping        |         |
| No ncAA | N-terminal Detection | BY4741                             | 3    | 21842  | (20519, 23165) | C        | 3    | 22214  | (19782, 24646)  | B       |
|         |                      | $\Delta$ UPF1                      | 3    | 40239  | (35152, 45327) | A        | 3    | 24240  | (-24791, 73271) | A B     |
|         |                      | $\Delta$ UPF2                      | 3    | 40741  | (36537, 44945) | A        | 3    | 31581  | (26703, 36458)  | A       |
|         |                      | $\Delta$ UPF3                      | 3    | 39293  | (34245, 44342) | A        | 3    | 28729  | (11789, 45669)  | A B     |
|         |                      | $\Delta$ TPA1                      | 3    | 24866  | (20806, 28927) | B C      | 3    | 22237  | (19672, 24802)  | B       |
|         |                      | $\Delta$ POP2                      | 3    | 25093  | (22536, 27651) | B C      | 3    | 24151  | (22582, 25720)  | A B     |
|         |                      | $\Delta$ PPQ1                      | 3    | 27321  | (24066, 30577) | B        | 3    | 30158  | (26379, 33936)  | A       |
| OmeY    | N-terminal Detection | BY4741                             | 3    | 25217  | (24785, 25650) | B        | 3    | 26170  | (23077, 29262)  | B       |
|         |                      | $\Delta$ UPF1                      | 3    | 30181  | (28558, 31804) | B        | 3    | 20145  | (-20097, 60387) | A B     |
|         |                      | $\Delta$ UPF2                      | 3    | 26703  | (23716, 29689) | B        | 3    | 25476  | (23820, 27132)  | B       |
|         |                      | $\Delta$ UPF3                      | 3    | 27402  | (25485, 29319) | B        | 3    | 23226  | (11752, 34700)  | A B     |
|         |                      | $\Delta$ TPA1                      | 3    | 30667  | (23963, 37371) | A B      | 3    | 29182  | (27342, 31022)  | B       |
|         |                      | $\Delta$ POP2                      | 3    | 29854  | (28143, 31565) | B        | 3    | 30352  | (26227, 34478)  | B       |
|         |                      | $\Delta$ PPQ1                      | 3    | 37452  | (34579, 40325) | A        | 3    | 39512  | (34341, 44683)  | A       |
| AzF     | N-terminal Detection | BY4741                             | 3    | 22982  | (20118, 25846) | C        | 3    | 27806  | (26300, 29312)  | C D     |
|         |                      | $\Delta$ UPF1                      | 3    | 38289  | (36302, 40277) | A        | 3    | 19546  | (-19395, 58487) | A B C D |
|         |                      | $\Delta$ UPF2                      | 3    | 37314  | (29370, 45259) | A B      | 3    | 26292  | (24915, 27669)  | D       |
|         |                      | $\Delta$ UPF3                      | 3    | 38267  | (34937, 41596) | A        | 3    | 24433  | (12446, 36420)  | A B C D |
|         |                      | $\Delta$ TPA1                      | 3    | 25831  | (22826, 28836) | B C      | 3    | 30374  | (28048, 32701)  | B C     |
|         |                      | $\Delta$ POP2                      | 3    | 26434  | (25195, 27672) | B C      | 3    | 32514  | (31093, 33936)  | B       |
|         |                      | $\Delta$ PPQ1                      | 3    | 29695  | (26503, 32886) | B        | 3    | 40822  | (36337, 45307)  | A       |

*\*Means that do not share a letter are statistically different*

**Table S12:** One-way ANOVA with groupings via the Games-Howell method to evaluate the varying expression levels of N-terminal detection for the drop-in yeast display reporter with various BY4741 single gene knockout strains via flow cytometry.

|         |                      | Flow Cytometry Data - Drop-in Yeast Display |      |        |                  |          |      |        |                |         |
|---------|----------------------|---------------------------------------------|------|--------|------------------|----------|------|--------|----------------|---------|
|         |                      | LeuOmeRS                                    |      |        |                  | TyrOmeRS |      |        |                |         |
|         |                      | N                                           | Mean | 95% CI | Grouping         | N        | Mean | 95% CI | Grouping       |         |
| No nCAA | N-terminal Detection | BY4741                                      | 3    | 6501   | (5316, 7686)     | C        | 3    | 5021   | (4406, 5636)   | C       |
|         |                      | ΔUPF1                                       | 3    | 16275  | (15347, 17202)   | A        | 3    | 14639  | (11834, 17443) | A       |
|         |                      | ΔUPF2                                       | 3    | 9628   | (9017, 10240)    | B        | 3    | 7882   | (6546, 9218)   | B       |
|         |                      | ΔUPF3                                       | 3    | 8927   | (7715, 10140)    | B        | 3    | 4955   | (-5721, 15630) | A B C D |
|         |                      | ΔTPA1                                       | 3    | 5194   | (4067, 6320)     | C D      | 3    | 4296   | (3247, 5346)   | C D     |
|         |                      | ΔPOP2                                       | 3    | 4701.7 | (4324.6, 5078.7) | C D      | 3    | 3971   | (3432, 4510)   | D       |
|         |                      | ΔPPQ1                                       | 3    | 4695   | (3758, 5632)     | D        | 3    | 4022   | (2811, 5232)   | C D     |
| OmeY    | N-terminal Detection | BY4741                                      | 3    | 5831   | (5030, 6633)     | C        | 3    | 5582   | (5033, 6132)   | B C     |
|         |                      | ΔUPF1                                       | 3    | 13641  | (11791, 15492)   | A        | 3    | 12060  | (10946, 13173) | A       |
|         |                      | ΔUPF2                                       | 3    | 7791.7 | (7698.6, 7884.7) | B        | 3    | 6630   | (5276, 7984)   | B       |
|         |                      | ΔUPF3                                       | 3    | 7565   | (5416, 9714)     | B C      | 3    | 7121   | (6067, 8174)   | B       |
|         |                      | ΔTPA1                                       | 3    | 4564   | (3633, 5496)     | C        | 3    | 4527   | (3750, 5303)   | C D     |
|         |                      | ΔPOP2                                       | 3    | 4008   | (3185, 4831)     | C        | 3    | 4013   | (3037, 4989)   | D       |
|         |                      | ΔPPQ1                                       | 3    | 4268   | (3286, 5250)     | C        | 3    | 4101   | (3636, 4567)   | D       |
| AzF     | N-terminal Detection | BY4741                                      | 3    | 7233.7 | (7010.1, 7457.3) | B        | 3    | 5567   | (4720, 6415)   | B C     |
|         |                      | ΔUPF1                                       | 3    | 17442  | (15792, 19091)   | A        | 3    | 13832  | (9660, 18004)  | A       |
|         |                      | ΔUPF2                                       | 3    | 8399   | (7669, 9130)     | B        | 3    | 6782   | (6296, 7268)   | A B     |
|         |                      | ΔUPF3                                       | 3    | 8650   | (7723, 9576)     | B        | 3    | 6705   | (5958, 7452)   | A B     |
|         |                      | ΔTPA1                                       | 3    | 4567   | (4355.8, 4778.2) | C        | 3    | 4090   | (3397, 4782)   | D       |
|         |                      | ΔPOP2                                       | 3    | 5020.3 | (4697.0, 5343.7) | C        | 3    | 4210   | (3588, 4832)   | D       |
|         |                      | ΔPPQ1                                       | 3    | 5159   | (4708, 5610)     | C        | 3    | 4329   | (3481, 5178)   | C D     |

*\*Means that do not share a letter are statistically different*

**Table S13:** Primers used for cloning the various reporters.

| Primer Name                               | Primer Sequence                                                                                    | Intended Reaction                                            | DNA Template  |
|-------------------------------------------|----------------------------------------------------------------------------------------------------|--------------------------------------------------------------|---------------|
| <b>N-GFP-F</b>                            | GTCAAGGAGAAAAACCCCGGATCG<br>AATCCCTACTTCATACATTTTCAATT<br>AAGATGTCCAAGGGCGAGGAGCTCT<br>TTAC        | Cloning pCTCON2-<br>sfGFP/sfGFP151TAG and<br>pCTCON2-GXB/GYB | pCTCON2-BYG   |
| <b>C-GFP-R</b>                            | CAGCAGCGGAGCCAGCGGATCCCAT<br>CTCGAGCTTATAGAGCTCATCCATGC<br>C                                       | Cloning pCTCON2-GXB/GYB                                      | pCTCON2-BYG   |
| <b>N-BFP-FX</b>                           | ATGGGATCCGCTGGCTCCGCTGCTG<br>GTTCTGGCGAATAGATGAGCGAGCT<br>GATTAAGGAGAACATG                         | Cloning pCTCON2-GXB                                          | pCTCON2-BYG   |
| <b>C-BFP-R</b>                            | GTTACATCTACACTGTTGTTATCAGAT<br>CTCGAGCTATTATTAGTGGTGGTGGT<br>GGTGGTGATTAAGCTTGTGCCCCAGT<br>TTGCTAG | Cloning pCTCON2-GXB/GYB                                      | pCTCON2-BYG   |
| <b>N-BFP-FY</b>                           | ATGGGATCCGCTGGCTCCGCTGCTG<br>GTTCTGGCGAATACATGAGCGAGCTG<br>ATTAAGGAGAACATG                         | Cloning pCTCON2-GYB                                          | pCTCON2-BYG   |
| <b>mTagBFP2-F-pCT</b>                     | ATCGAGAATTCCTACTTCATACATTT<br>TCAATTAAGATGAGCGAGCTGATTAA<br>GGAGAAC                                | Cloning pCTCON2-BXG/BYG                                      | pBAD-mTAGBFP2 |
| <b>mTagBFP2-R-pCT</b>                     | ATCGAGGATCCCATATTAAGCTTGTG<br>CCCCAGTTTGC                                                          | Cloning pCTCON2-BXG/BYG                                      | pBAD-mTAGBFP2 |
| <b>GFP-151F</b>                           | CTGGAGTATAATTTCAATTCATAAT<br>GTATAGATTACCGCAGATAAGCAAAA<br>GAATGGC                                 | Cloning pCTCON2-<br>sfGFP151TAG                              | pCTCON2-BYG   |
| <b>GFP-151R</b>                           | GCCATTCTTTTGTCTTATCTGCGTAAT<br>CTATACATTATGGGAATTGAAATTATA<br>CTCCAG                               | Cloning pCTCON2-<br>sfGFP151TAG                              | pCTCON2-BYG   |
| <b>Rev-BgIII-HIS</b>                      | GTTACATCTACACTGTTGTTATCAGAT<br>CTCGAGCTATTATTAGTGGTGGTGGT<br>GGTGGTG                               | Cloning pCTCON2-<br>sfGFP151TAG and pCTCON2-<br>sfGFP        | pCTCON2-BYG   |
| <b>pCTCON2-BFP-Fwd</b>                    | TTAACGTCAAGGAGAAAAACCCCGG<br>ATCG                                                                  | Amplify BFP-GFP from<br>pCTCON2 construct                    | pCTCON2-BXG   |
| <b>pCTCON2-GFP-Rev</b>                    | GAGCTCATCCATGCCATGAGTAATGC<br>CTGC                                                                 | Amplify BFP-GFP from<br>pCTCON2 construct                    | pCTCON2-BXG   |
| <b>RCFwd_1TAG_BFP<br/>GFP</b>             | GCCCTTGGATGCGTATTGCGCAGAAC<br>CAGCAGCGGAGCCAG<br>CCTATCCCATATTAAGCTT                               | Amplify BFP segment with<br>altTAG location                  | pCTCON2-BXG   |
| <b>Fwd_1TAG_BFP<br/>GFP</b>               | AAGCTTAATATGGGATAGGCTGGCTC<br>CGCTGCTGGTTCTG<br>GCGAATACGCATCCAAGGGC                               | Amplify GFP segment with<br>altTAG location                  | pCTCON2-BXG   |
| <b>RCForward_AltTA<br/>G2_BFP<br/>GFP</b> | GCCCTTGGATGCGTATTGCGCAGAAC<br>CAGCAGCCTAGCCAGCGGATCCCAT<br>ATTAAGCTT                               | Amplify BFP segment with<br>altTAG2 location                 | pCTCON2-BYG   |
| <b>Forward_AltTAG2_<br/>BFP<br/>GFP</b>   | AAGCTTAATATGGGATCCGCTGGCTA<br>GGCTGCTGGTTCTGGCGAATACGCAT<br>CCAAGGGC                               | Amplify GFP segment with<br>altTAG2 location                 | pCTCON2-BYG   |
| <b>RCForward_AltTA<br/>G3_BFP<br/>GFP</b> | GCCCTTGGATGCGTATTGCGCAGAAC<br>CCTAAGCGGAGCCAGCGGATCCCAT<br>ATTAAGCTT                               | Amplify BFP segment with<br>altTAG3 location                 | pCTCON2-BYG   |
| <b>Forward_AltTAG3_<br/>BFP<br/>GFP</b>   | AAGCTTAATATGGGATCCGCTGGCTC<br>CGCTTAGGTTCTGGCGAATACGCAT<br>CCAAGGGC                                | Amplify GFP segment with<br>altTAG3 location                 | pCTCON2-BYG   |
| <b>RCForward_AltTA<br/>G4_BFP<br/>GFP</b> | GCCCTTGGATGCGTATTGCGCCTAAC<br>CAGCAGCGGAGCCAGCGGATCCCAT<br>ATTAAGCTT                               | Amplify BFP segment with<br>altTAG4 location                 | pCTCON2-BYG   |

|                                     |                                                                         |                                                                                   |                                                     |
|-------------------------------------|-------------------------------------------------------------------------|-----------------------------------------------------------------------------------|-----------------------------------------------------|
| <b>Forward_AltTAG4_BFPGFP</b>       | AAGCTTAATATGGGATCCGCTGGCTC<br>CGCTGCTGGTTAGGGCGAATACGCA<br>TCCAAGGGC    | Amplify GFP segment with<br>altTAG4 location                                      | pCTCON2-BYG                                         |
| <b>RCFwd_2TAG_BFP<br/>GFP</b>       | GCCCTTGATGCCTATTCGCCAGAAC<br>CAGCAGCGGAGCCAGCCTATCCCAT<br>ATTAAGCTT     | Amplify BFP segment with<br>2TAG location                                         | pCTCON2-BXG                                         |
| <b>Fwd_2TAG_BFPGF<br/>P</b>         | AAGCTTAATATGGGATAGGCTGGCTC<br>CGCTGCTGGTTCTGGCGAATAGGCAT<br>CCAAGGGC    | Amplify GFP segment with<br>2TAG location                                         | pCTCON2-BXG                                         |
| <b>pCTCON2-XbaI-<br/>fwd-Gibson</b> | AGCTGGAGCTCCACCGCGGTGGCGG<br>CCGCTCTAGAGCTGGTACCAATTCCT<br>TGAATTTTC    | Amplify reporter from pCTCON2<br>vector to pRS416 vector                          | pCTCON2-BXG-altTAG,<br>pCTCON2-BXG                  |
| <b>Gibson Sall Rev</b>              | GCGAATTGGGTACCGGGCCCCCCT<br>CGAGGTCGACCGAATTGGAGCTCAAT<br>TCTCTTAGG     | Amplify reporter from pCTCON2<br>vector to pRS416 vector                          | pCTCON2-BXG-altTAG,<br>pCTCON2-BXG                  |
| <b>L1TAGfwd</b>                     | GCGGTAGCGGAGGCGGAGGGTCGG<br>CTAGCTAGATACAGATGACTCAAAGT<br>CCCAGTTCACATA | Used to introduce a TAG codon<br>on the L1 position                               | pRS416-Aga1p-<br>FAPB2.3.6                          |
| <b>L1TAGrev</b>                     | TAGTGAAGTGGGACTTTGAGTCATCT<br>GTATCTAGCTAGCCGACCTCCGCCT<br>CCGCTACCGC   | Used to introduce a TAG codon<br>on the L1 position                               | pRS416-Aga1p-<br>FAPB2.3.6                          |
| <b>Aga1p-G2957A-<br/>FWD</b>        | ACCATTGATGAAGTTTGGTATTGTATG<br>GAGATTGAAGTAGT<br>GGAAACTTCTGTAGTGGT     | Used to fix mutation in Aga1p<br>for the WT constructs                            | pRS416-Aga1p-<br>FAPB2.3.6                          |
| <b>Aga1p-G2957A-<br/>REV</b>        | TACCACTACAGAAGTTTCCACTACTTC<br>AATCTCCATACAATAC<br>CAAACCTTCATCAATGGT   | Used to fix mutation in Aga1p<br>for the WT constructs                            | pRS416-Aga1p-<br>FAPB2.3.6                          |
| <b>1-DROPIN-Rv3</b>                 | AACCCTCACTAAAGGGAACAAAAGCT<br>GGGTACCTTAACTGAAAATTACATTG<br>CAAGCAAC    | Used to amplify Aga1p from YIP<br>sHRPa-Aga1p                                     | YIP sHRPa-Aga1p                                     |
| <b>2-DROPIN-Fv3</b>                 | AATATTGCCTTGCCATCTGATCCAGA<br>AACGATTCTAGTGACGATAACCAAGA<br>CAAACGAT    | Used to amplify Aga1p from YIP<br>sHRPa-Aga1p                                     | YIP sHRPa-Aga1p                                     |
| <b>3-DROPIN-Rv3</b>                 | ATCGTTTGTCTTGGTTATCGTCACTAG<br>AATCGTTTCTGGATCAGATGCCAAGG<br>CAATATT    | Used to amplify the region<br>between GAL1-10 and Aga1p<br>overlap in pCTCON2     | pCTCON2                                             |
| <b>4-DROPIN-Fv3</b>                 | AAAGTAAGAATTTTTGAAAATTCAATA<br>TAAATGACATTATCTTTGCTCATT<br>ACCTAC       | Used to amplify the region<br>between GAL1-10 and Aga1p<br>overlap in pCTCON2     | pCTCON2                                             |
| <b>pRS416Aga1pXbaI<br/>JSFwd</b>    | GCTGGAGCTCCACCGCGGTGGCGGC<br>CGCTCTAGAGGTACCTTAACTGAAAA<br>TTACATTGC    | Updated primer from KpnI<br>forward for Aga1p cloning in<br>pRS416                | pCTCON2-Aga1p-<br>FAPB2.3.6                         |
| <b>Con2seqfwd</b>                   | GTTCCAGACTACGCTCTGCAG                                                   | Used to amplify FAPB2.3.6 and<br>FAPB2.3.6L1TAG for cloning<br>into pCTCON2-Aga1p | pCTCON2-FAPB2.3.6<br>and pCTCON2-<br>FAPB2.3.6L1TAG |
| <b>Con2seqrev</b>                   | GATTTTGTACATCTACACTGTT                                                  | Used to amplify FAPB2.3.6 and<br>FAPB2.3.6L1TAG for cloning<br>into pCTCON2-Aga1p | pCTCON2-FAPB2.3.6<br>and pCTCON2-<br>FAPB2.3.6L1TAG |

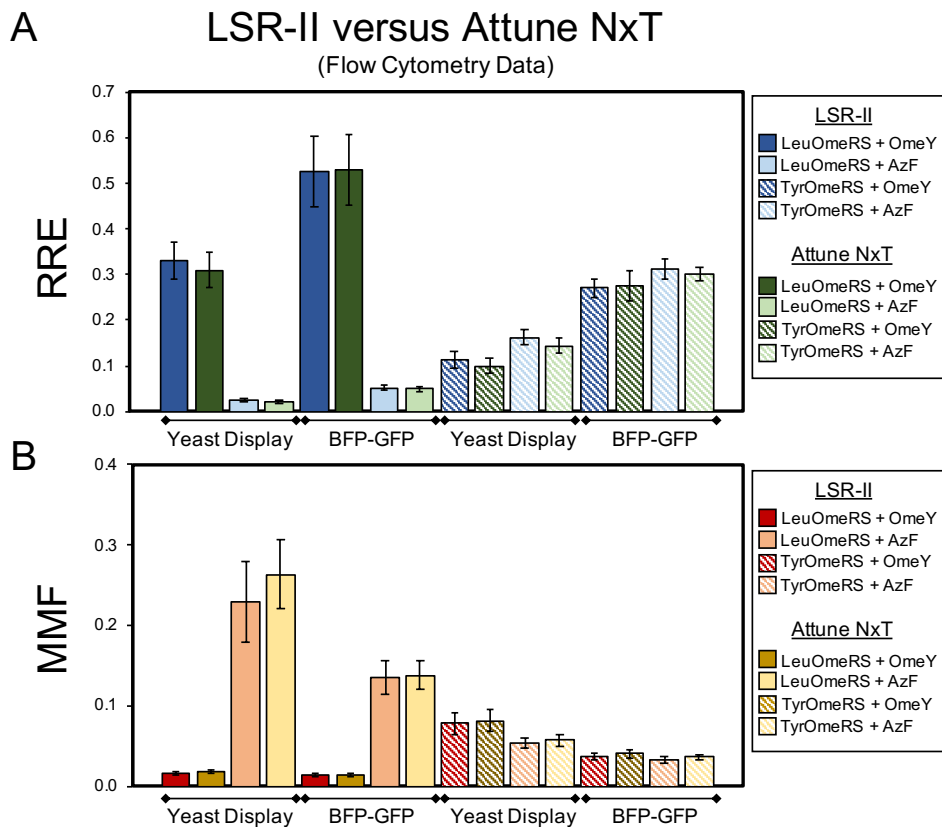

**Fig. S1:** Comparison of measurements of ncAA incorporation between two different flow cytometers (LSR-II and Attune NxT). Yeast display and BFP-GFP fluorescent reporter calculations of (A) relative readthrough efficiency (RRE) and (B) maximum misincorporation frequency (MMF) with four orthogonal translation system-ncAA combinations run on both the LSR-II and Attune NxT. Cells from the same induced cultures were run on each instrument in these experiments. For a summary of statistical analyses comparing the datasets obtained on the different instruments, see Table S13.

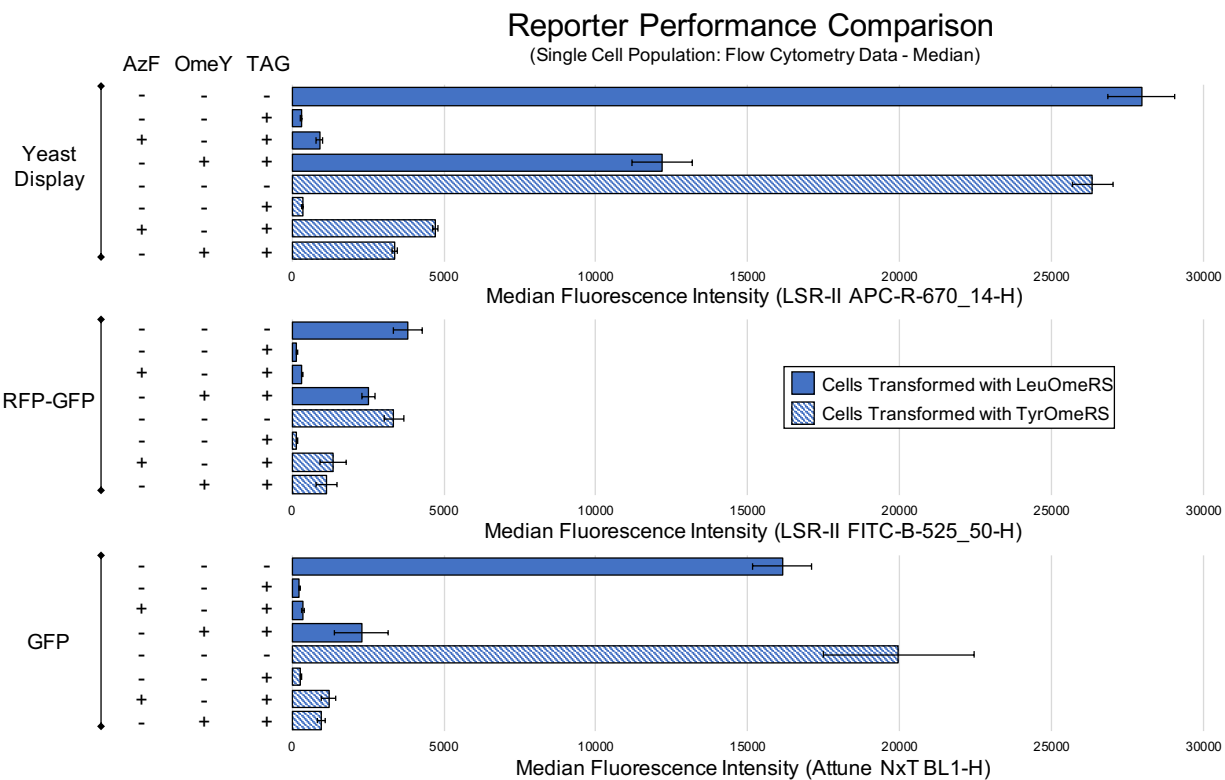

**Fig. S2:** Reporter performance comparison. Quantification of ncAA incorporation efficiency for four orthogonal translation system-ncAA combinations performed with yeast display, a RFP-GFP dual-fluorescent protein reporter, and a sfGFP single-fluorescent protein reporter. Performance was evaluated with an alternative analysis method using the median fluorescence intensity of the gated single cell population (see Materials and Methods for details). The condition denoted by absence of ncAAs and a TAG codon is the wild-type reporter construct induced in the absence of ncAAs.

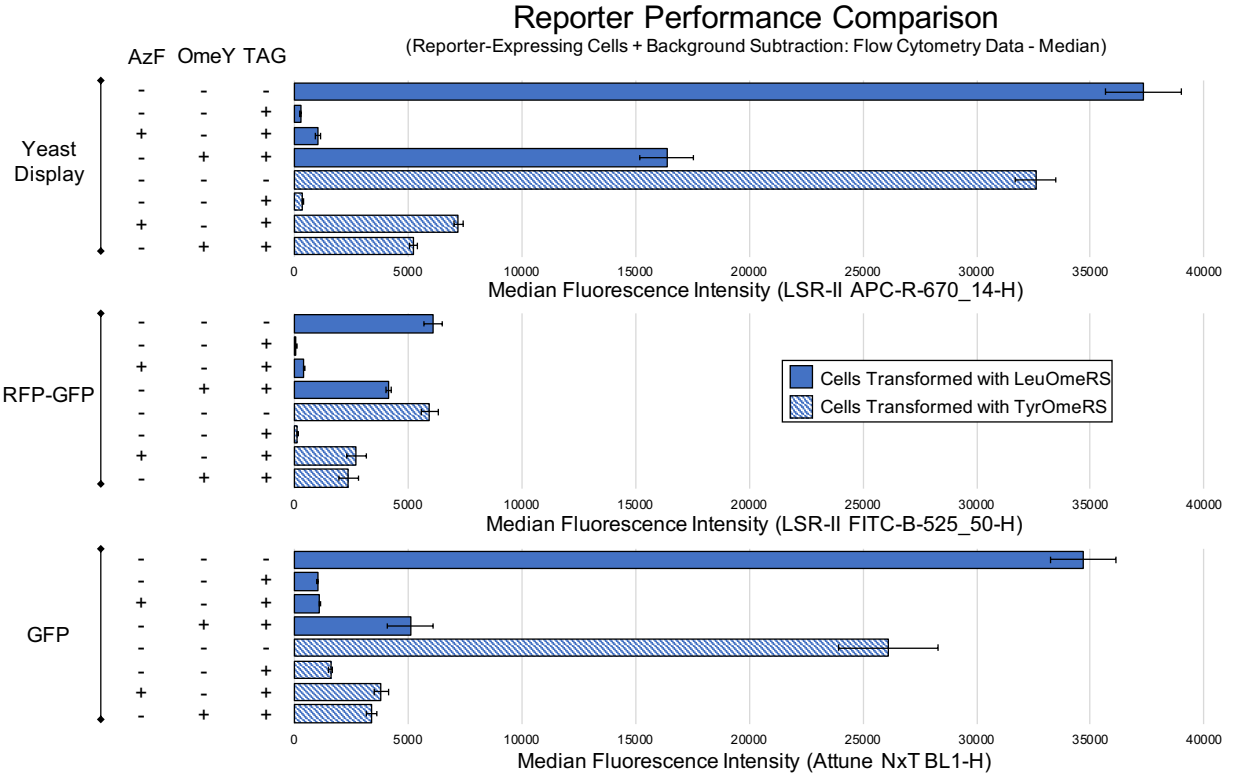

**Fig. S3:** Reporter performance comparison. Quantification of ncAA incorporation efficiency for four orthogonal translation system-ncAA combinations performed with yeast display, a RFP-GFP dual-fluorescent protein reporter, and a sfGFP single-fluorescent protein reporter. Performance was evaluated with an alternative analysis method using the median fluorescence intensity of reporter-expressing cells with background subtraction. The condition denoted by absence of ncAAs and a TAG codon is the wild-type reporter construct induced in the absence of ncAAs.

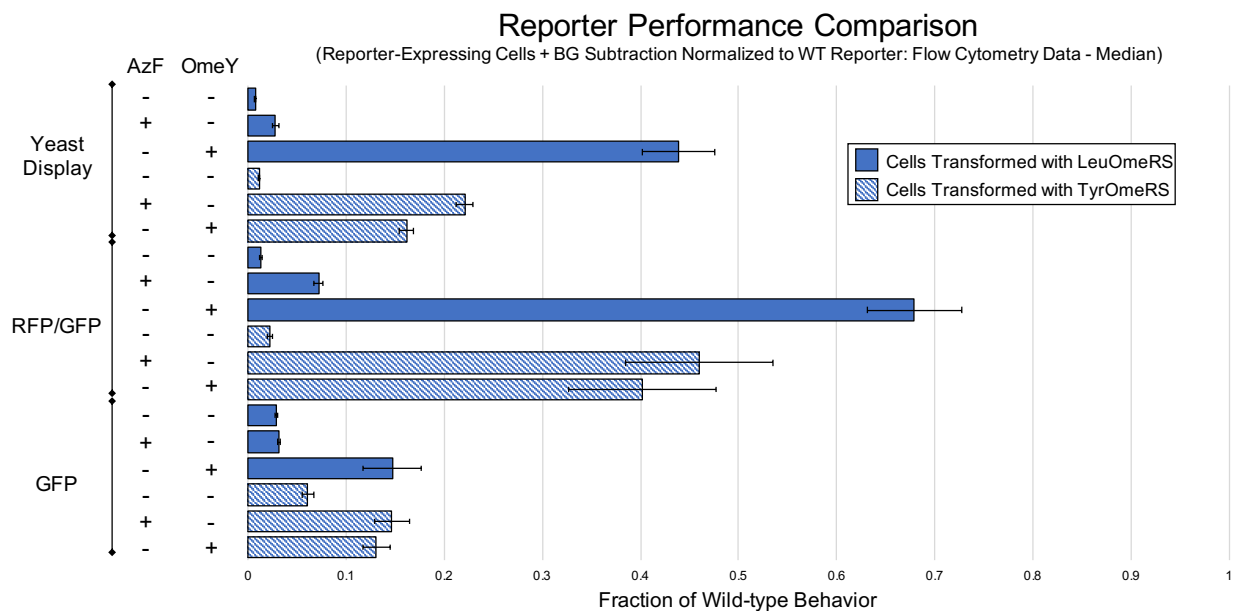

**Fig. S4:** Reporter performance comparison. Quantification of ncAA incorporation efficiency for four orthogonal translation system-ncAA combinations performed with yeast display, a RFP-GFP dual-fluorescent protein reporter, and a sfGFP single-fluorescent protein reporter. Performance was evaluated with an alternative analysis method using the median fluorescence intensity of reporter-expressing cells with background subtraction and normalization to the median fluorescence intensity of the cells expressing the wild-type construct induced in the absence of ncAAs (see Materials and Methods for details).



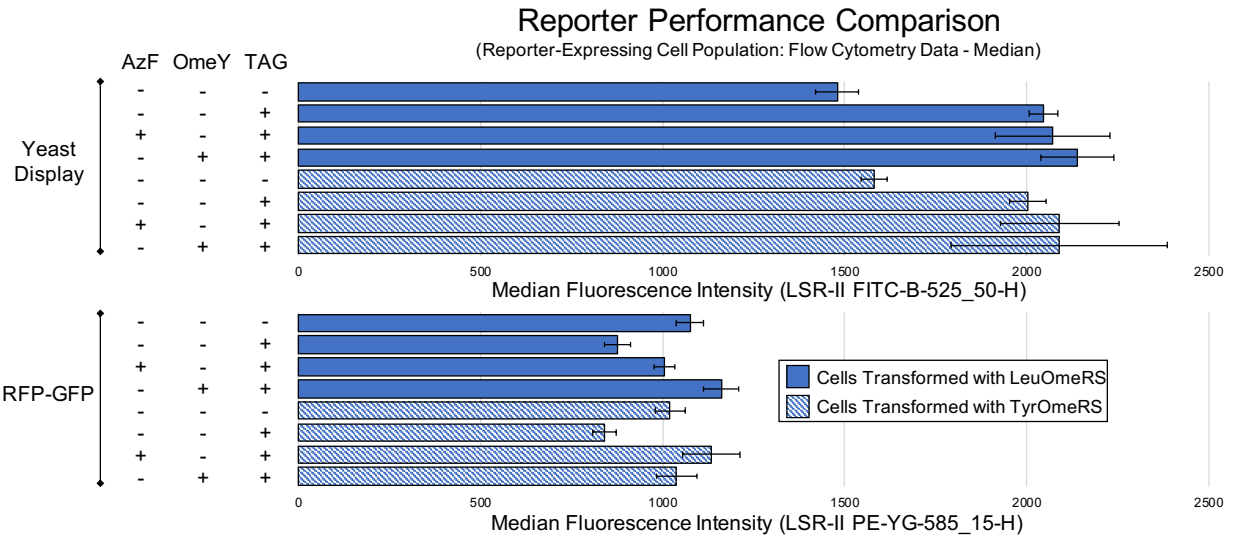

**Fig. S5:** Reporter performance comparison. Measurement of reporter expression level (either yeast display or a RFP-GFP dual-fluorescent protein reporter) with an alternative analysis method using the median fluorescence intensity of the cell population exhibiting above-background reporter expression. The condition denoted by absence of ncAAs and a TAG codon is the wild-type reporter construct induced in the absence of ncAAs.

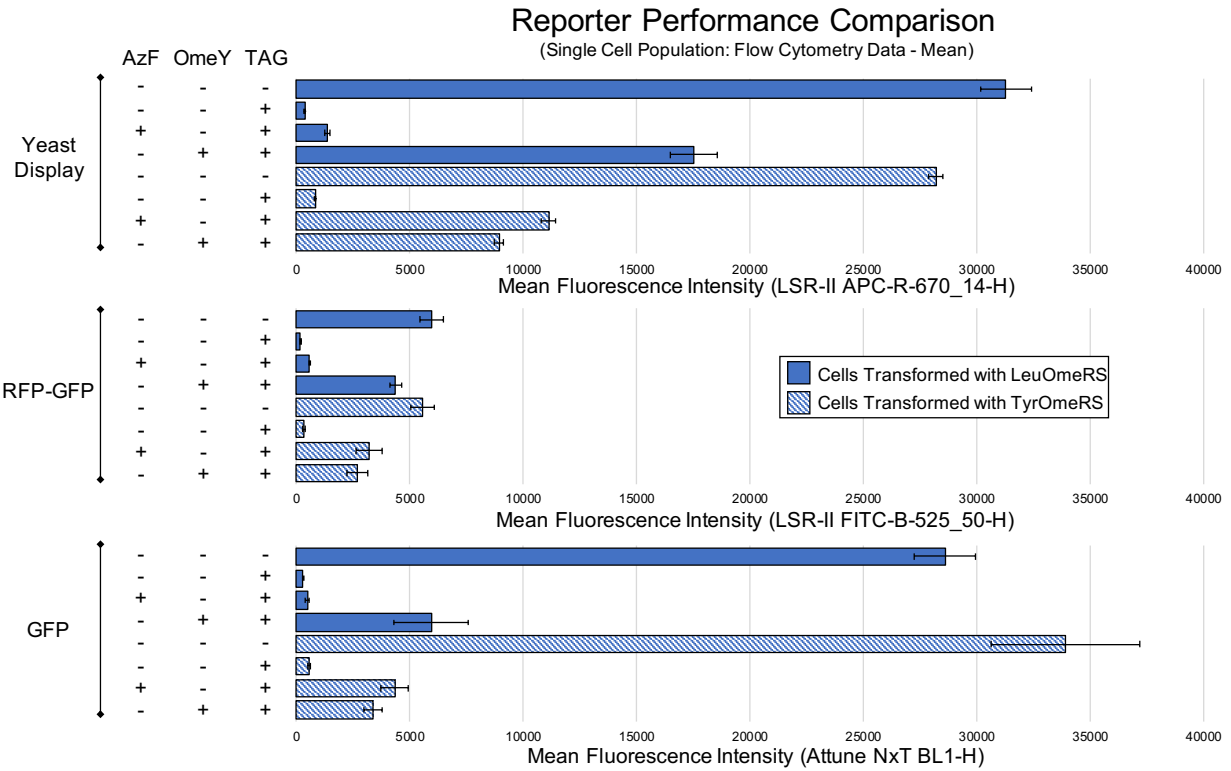

**Fig. S6:** Reporter performance comparison. Quantification of ncAA incorporation efficiency for four orthogonal translation system-ncAA combinations performed with yeast display, a RFP-GFP dual-fluorescent protein reporter, and a sfGFP single-fluorescent protein reporter. Performance was evaluated with an alternative analysis method using the mean fluorescence intensity of the single cell population. The condition denoted by absence of ncAAs and a TAG codon is the wild-type reporter construct induced in the absence of ncAAs.

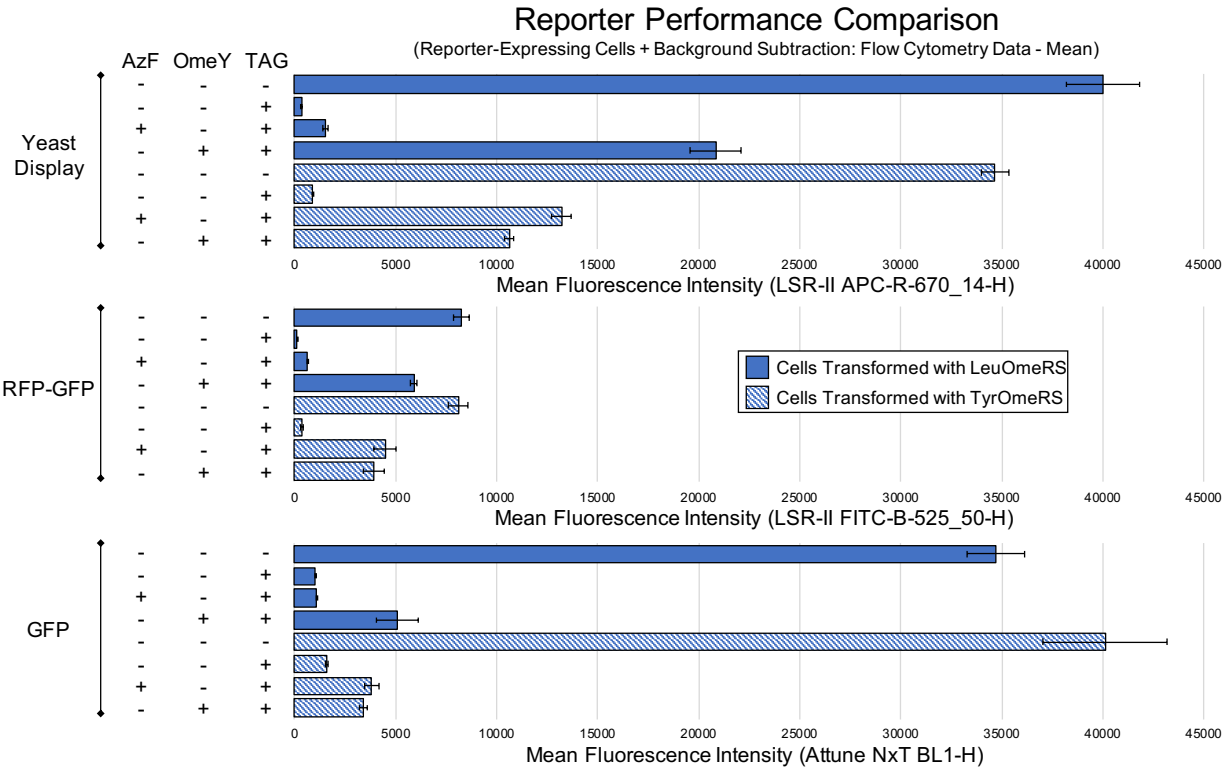

**Fig. S7:** Reporter performance comparison. Quantification of ncAA incorporation efficiency for four orthogonal translation system-ncAA combinations performed with yeast display, a RFP-GFP dual-fluorescent protein reporter, and a sfGFP single-fluorescent protein reporter. Performance was evaluated with an alternative analysis method using the mean fluorescence intensity of reporter-expressing cells with background subtraction. The condition denoted by absence of ncAAs and a TAG codon is the wild-type reporter construct induced in the absence of ncAAs.

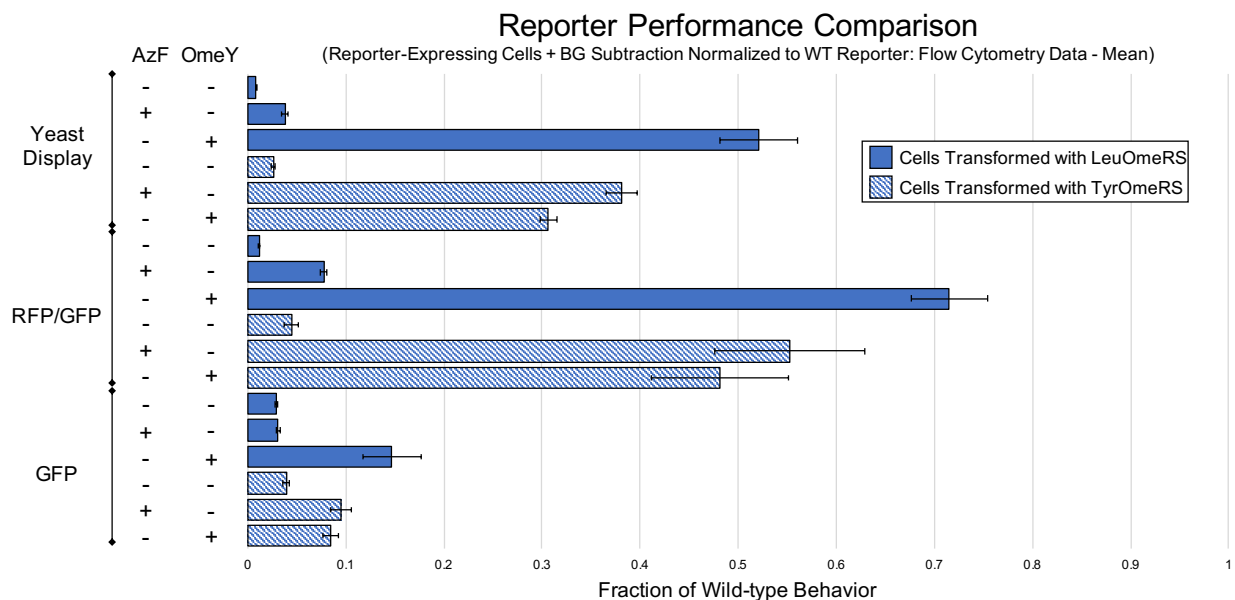

**Fig. S8:** Reporter performance comparison. Quantification of ncAA incorporation efficiency for four orthogonal translation system-ncAA combinations performed with yeast display, a RFP-GFP dual-fluorescent protein reporter, and a sfGFP single-fluorescent protein reporter. Performance was evaluated with an alternative analysis method using the mean fluorescence intensity of reporter-expressing cells with background subtraction and normalized to the mean fluorescence intensity of the cells expressing the wild-type construct induced in the absence of ncAAs.

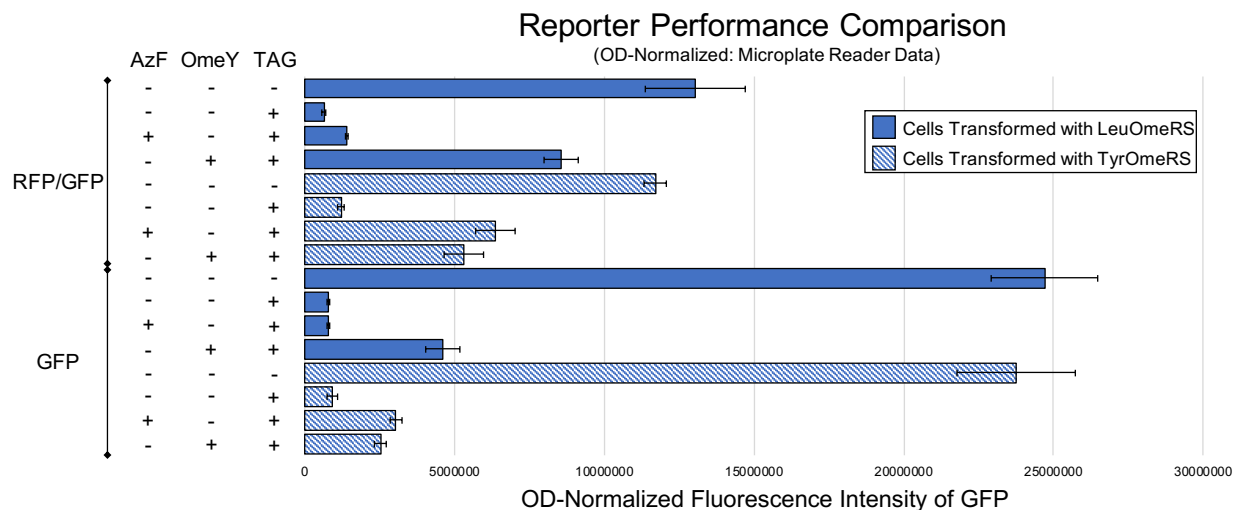

**Fig. S9:** Reporter performance comparison. Quantification of nAA incorporation efficiency for four orthogonal translation system-nAA combinations performed with a RFP-GFP dual-fluorescent protein reporter, and a sfGFP single-fluorescent protein reporter and analyzed on a microplate reader. Performance was evaluated with an alternative analysis method using sample fluorescence normalized to sample OD600. The condition denoted by absence of nAAs and a TAG codon is the wild-type reporter construct induced in the absence of nAAs.

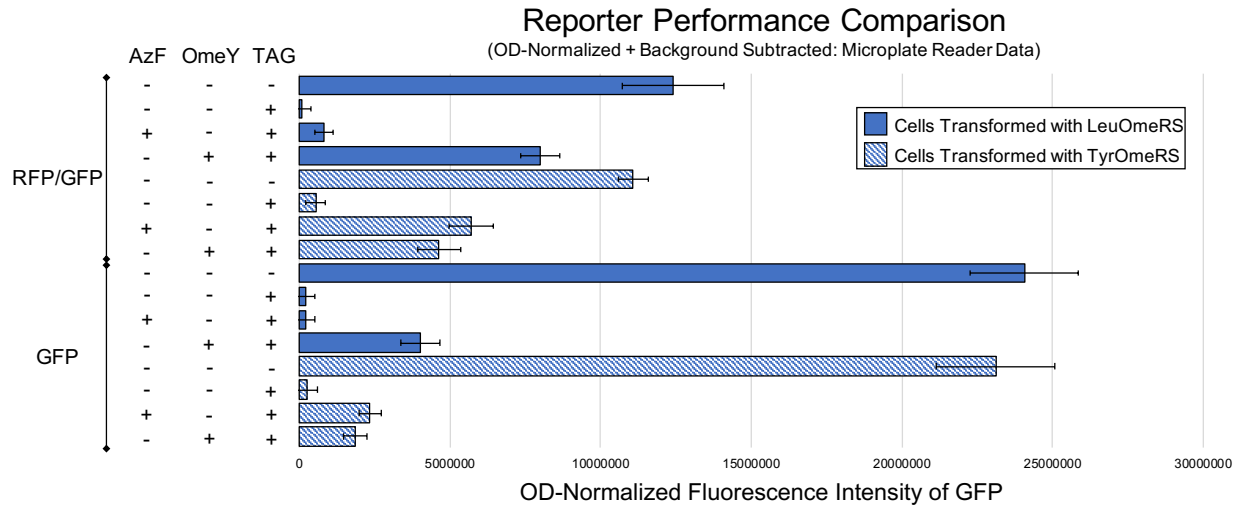

**Fig. S10:** Reporter performance comparison. Quantification of ncAA incorporation efficiency for four orthogonal translation system-ncAA combinations performed with a RFP-GFP dual-fluorescent protein reporter, and a sfGFP single-fluorescent protein reporter and analyzed on a microplate reader. Performance was evaluated with an alternative analysis method using sample fluorescence normalized to sample OD600 and followed by background subtraction to account for cellular autofluorescence. The condition denoted by absence of ncAAs and a TAG codon is the wild-type reporter construct induced in the absence of ncAAs.

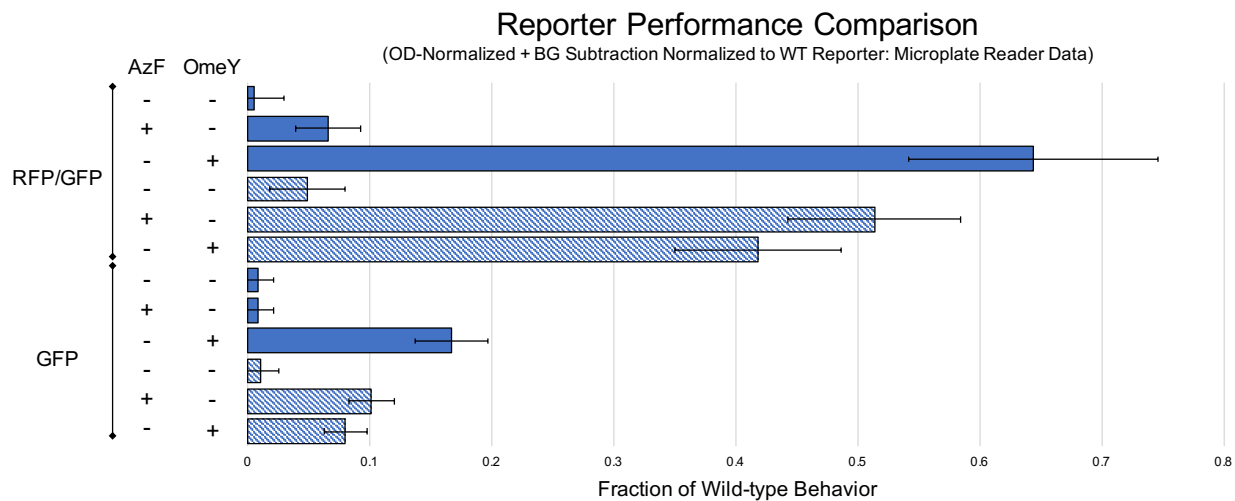

**Fig. S11:** Reporter performance comparison. Quantification of ncAA incorporation efficiency for four orthogonal translation system-ncAA combinations performed with a RFP-GFP dual-fluorescent reporter, and a sfGFP single-fluorescent reporter. Performance was evaluated with an alternative analysis method using sample fluorescence normalized to sample OD600 with background subtraction and normalization to the cells expressing the wild-type reporter (also OD600 normalized) induced in the absence of ncAAs.

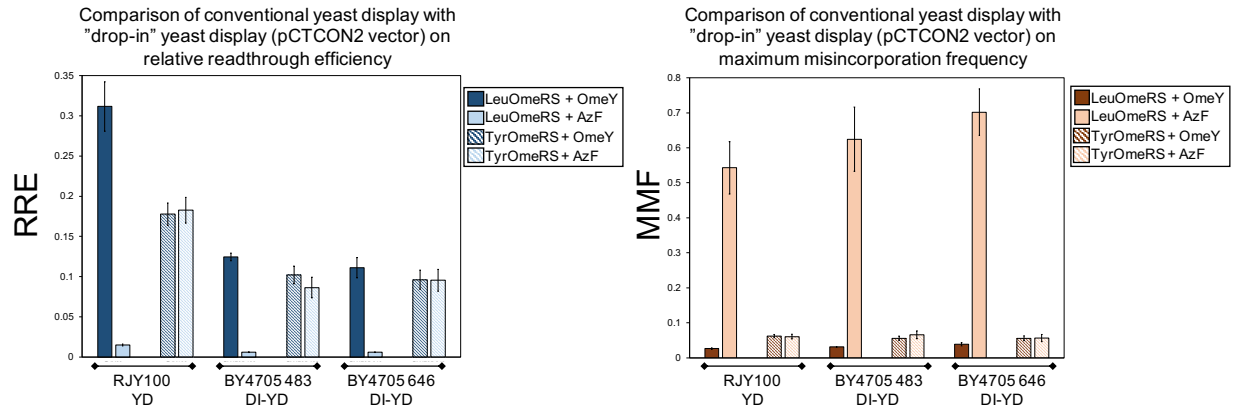

**Figure S12:** Conventional yeast display (YD) versus drop-in yeast display (DI-YD). Quantification of ncAA incorporation efficiency and fidelity for conventional display (in RJY100) and drop-in display (in multiple  $\Delta$ TRP1 strains) in a pCTCON2 vector.



## BY4741 Knockout Strains with Additional Reporters

(Flow Cytometry Data)

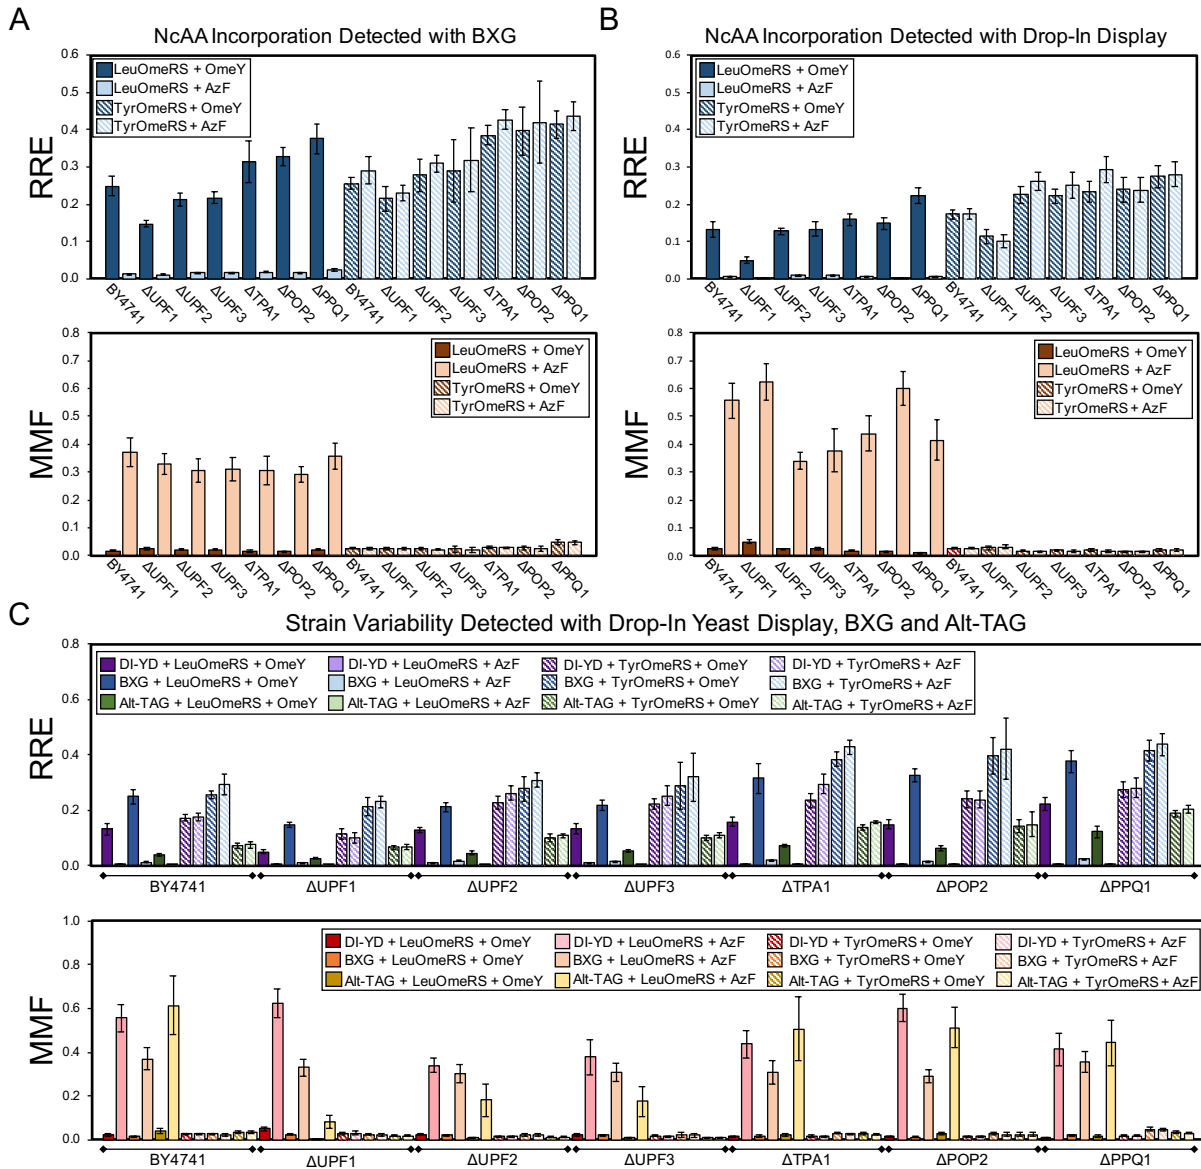

**Figure S13:** Evaluation of nCAA incorporation events in a series of single-gene knockout strains using two dual-fluorescent protein reporters and a drop-in yeast display (DI-YD) reporter. (A) Measurements of nCAA incorporation efficiency and fidelity in BY4741 and six single-gene knockouts of BY4741 using the BXG BFP-GFP reporter in a pRS416 (URA3 marker) plasmid backbone. (B) Measurements of nCAA incorporation efficiency and fidelity in BY4741 and six single-gene knockouts of BY4741 using the drop-in yeast display reporter in a pRS416 (URA3 marker) plasmid backbone. (C) Complete set of nCAA incorporation measurements for efficiency and fidelity using the Alt-TAG BFP-GFP reporter, BXG BFP-GFP reporter, and drop-in yeast display reporter in pRS416 (URA marker) plasmid backbones. All conditions reported here were evaluated with end point measurements in biological triplicate. The statistical analyses for these data can be found in Tables S7-S12.

## BY4741 KO Strains with Alt-TAG

(Single Cell Population: Flow Cytometry Data - Median)

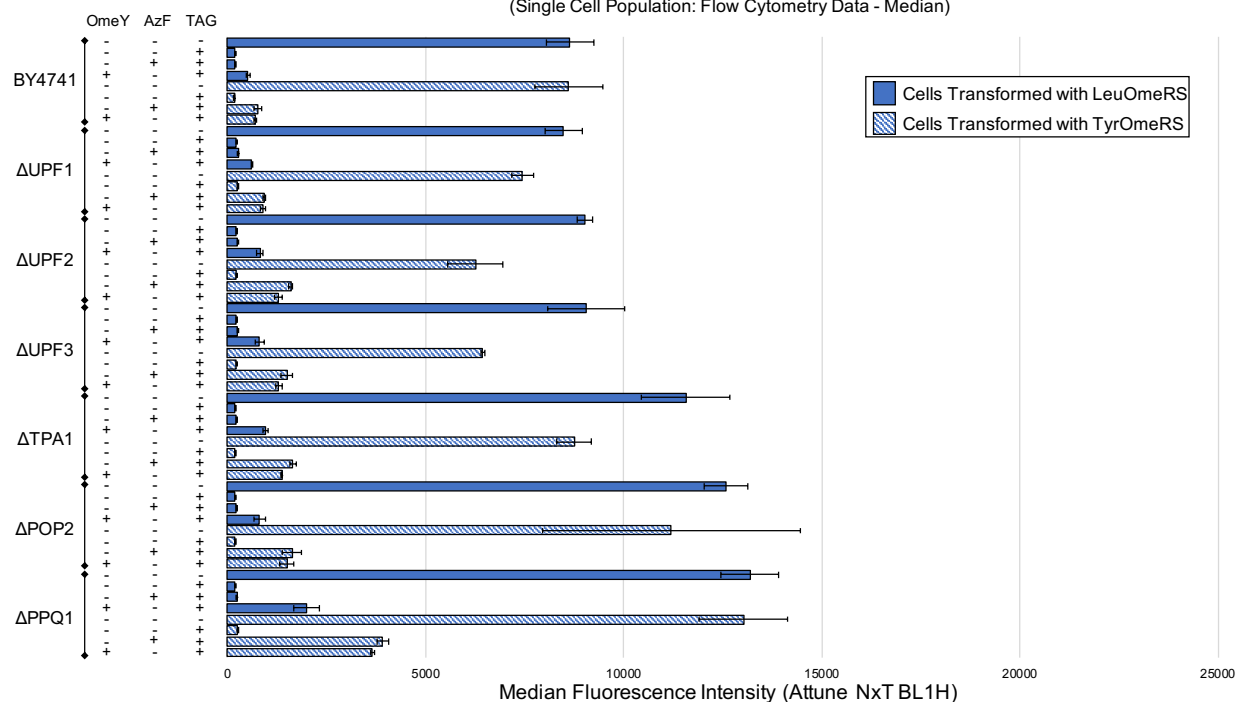

**Fig. S14:** Alternate analysis of BY4741 and six single-gene knockout strains using the Alt-TAG BFP-GFP dual-fluorescent protein reporter. Measurements for the efficiency of nAA incorporation calculated with median fluorescence intensity using single cell population analysis as described in Materials and Methods Section 2.11. The condition denoted by absence of nAAs and a TAG codon is the wild-type reporter construct induced in the absence of nAAs.

## BY4741 KO Strains with Alt-TAG

(Reporter-Expressing Cells + Background Subtraction: Flow Cytometry Data - Median)

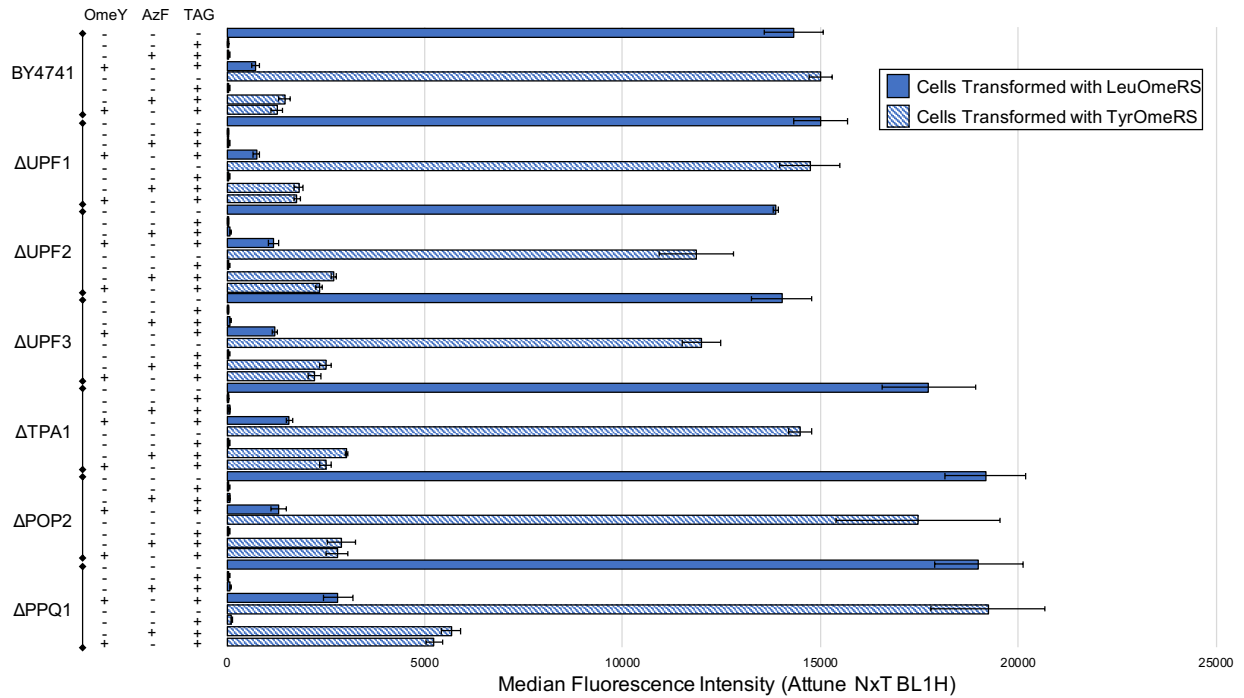

**Fig. S15:** Alternate analysis of BY4741 and six single-gene knockout strains using the Alt-TAG BFP-GFP dual-fluorescent protein reporter. Measurements for the efficiency of nAA incorporation calculated using the median fluorescence intensity of reporter-expressing cells with background subtraction as described in Materials and Methods Section 2.11. The condition denoted by absence of nAA and TAG codon is the wild-type reporter construct induced in the absence of nAAs.

## BY4741 KO Strains with Alt-TAG

(Reporter-Expressing Cells + BG Subtraction Normalized to WT Reporter: Flow Cytometry Data - Median)

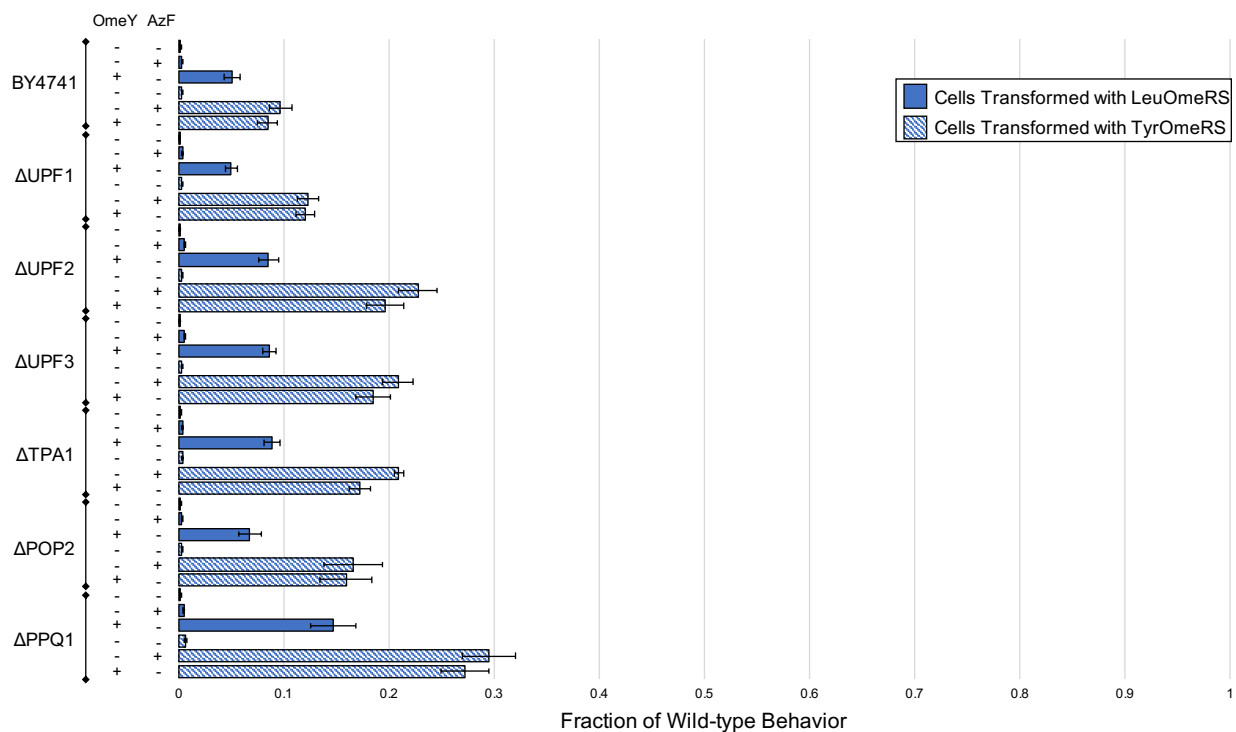

**Fig. S16:** Alternate analysis of BY4741 and six single-gene knockout strains using the Alt-TAG BFP-GFP dual-fluorescent protein reporter. Measurements for the efficiency of ncAA incorporation calculated using the median fluorescence intensity of reporter-expressing cells with background subtraction and normalized to expression levels of cells expressing the wild-type reporter induced in the absence of ncAAs.

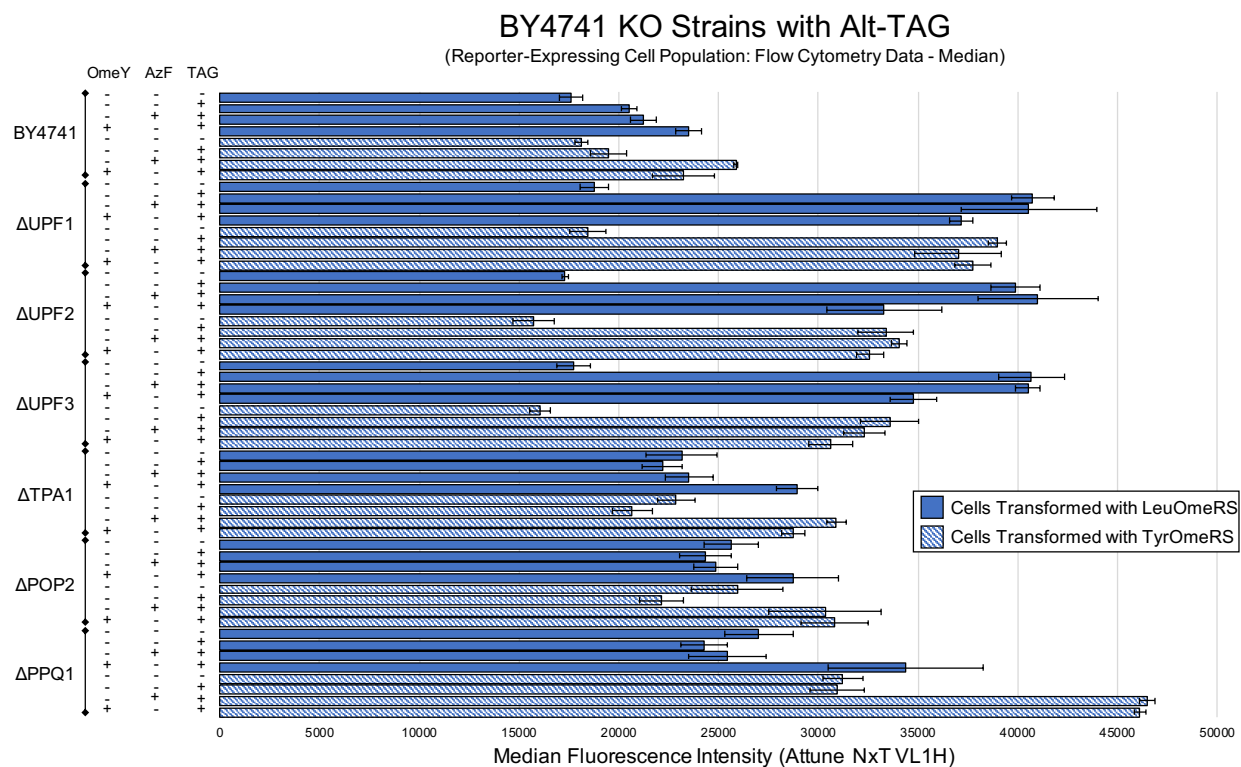

**Fig. S17:** Measurement of reporter expression level in BY4741 and six single-gene knockout strains containing Alt-TAG BFP-GFP using the median fluorescence intensity of the cell population exhibiting above-background reporter expression. The condition denoted by absence of ncAAs and a TAG codon is the wild-type reporter construct induced in the absence of ncAAs.

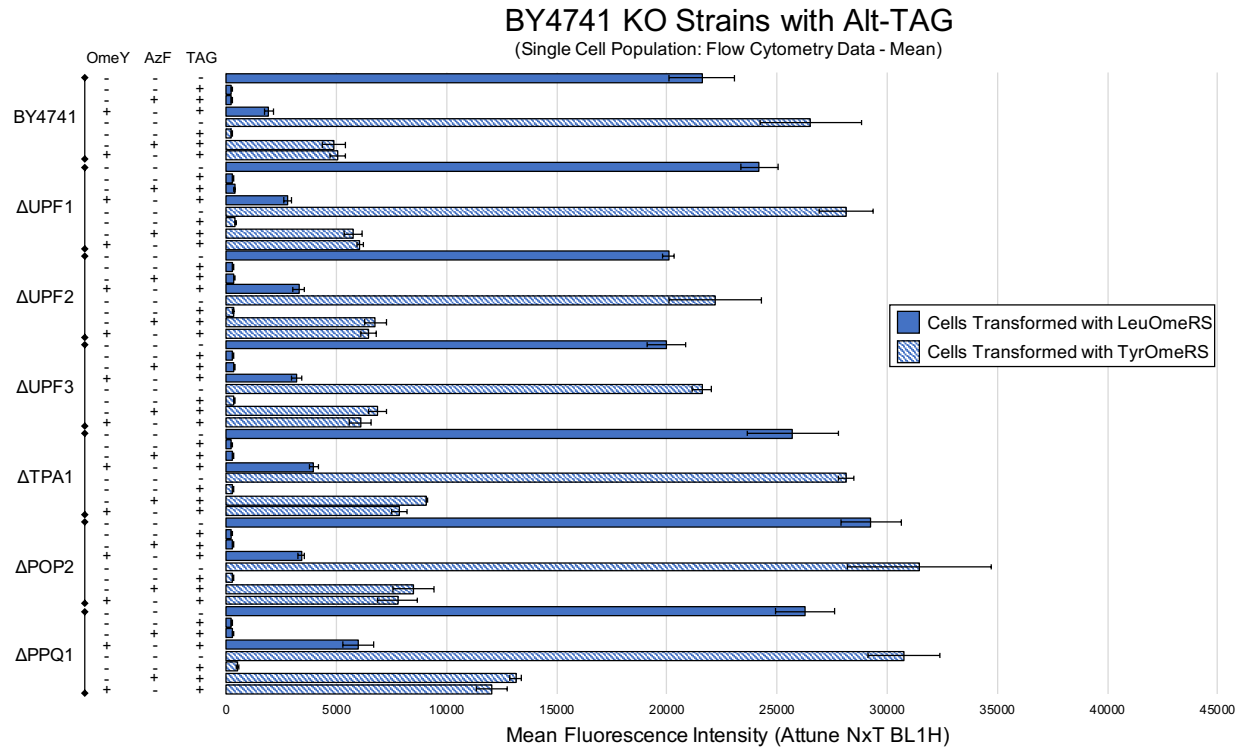

**Fig. S18:** Alternate analysis of BY4741 and six single-gene knockout strains using the Alt-TAG BFP-GFP dual-fluorescent protein reporter. Performance was evaluated using the mean fluorescence intensity of the single cell population. The condition denoted by absence of ncAAs and a TAG codon is the wild-type reporter construct induced in the absence of ncAAs.

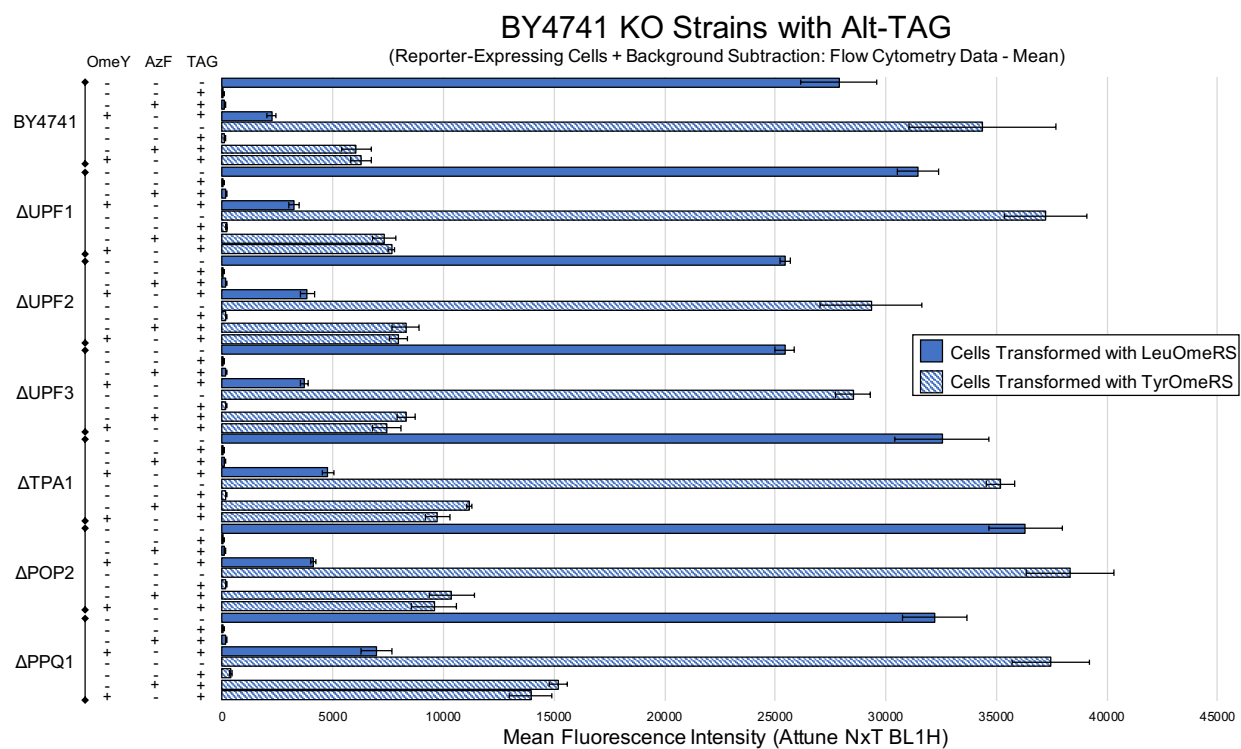

**Fig. S19:** Alternate analysis of BY4741 and six single-gene knockout strains using the Alt-TAG BFP-GFP dual-fluorescent protein reporter. Performance was evaluated using the mean fluorescence intensity of reporter-expressing cells with background subtraction. The condition denoted by absence of nAAs and a TAG codon is the wild-type reporter construct induced in the absence of nAAs.

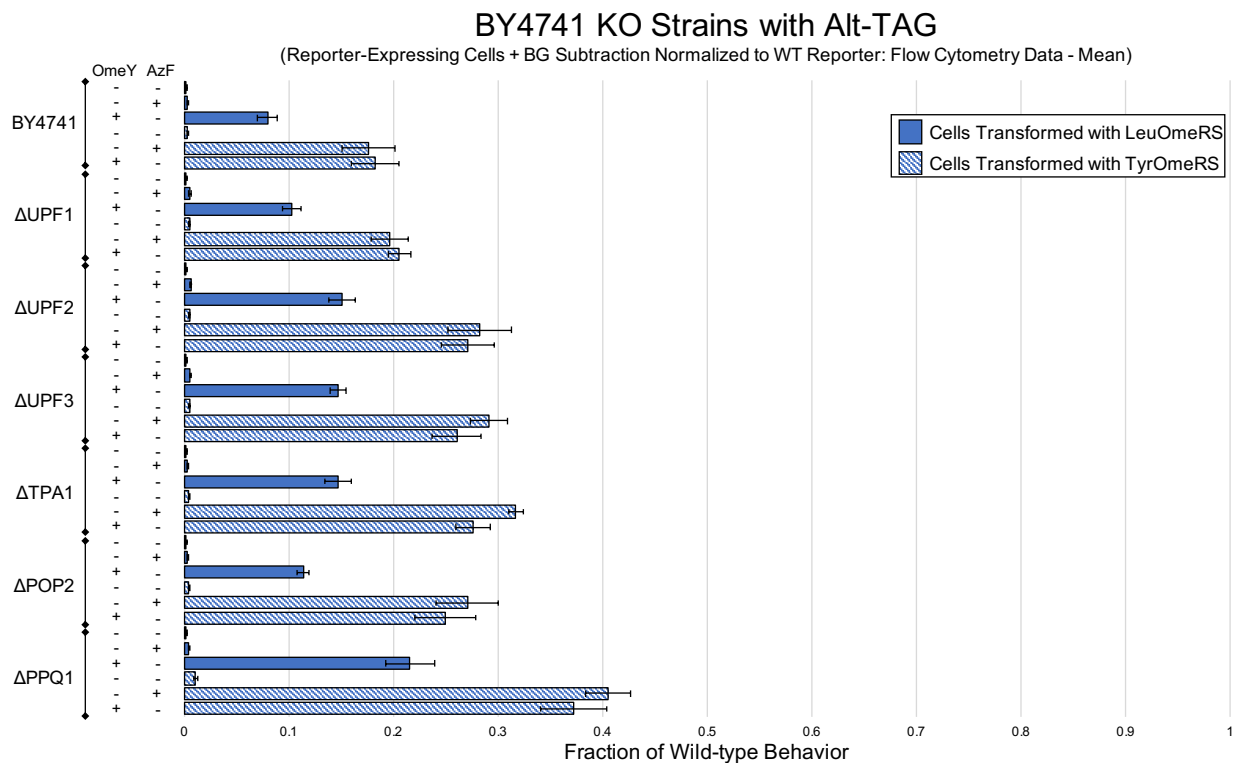

**Fig. S20:** Alternate analysis of BY4741 and six single-gene knockout strains using the Alt-TAG BFP-GFP dual-fluorescent protein reporter. Measurements for the efficiency of nCAA incorporation calculated using the mean fluorescence intensity of reporter-expressing cells with background subtraction and normalized to mean expression levels of cells expressing the wild-type reporter induced in the absence of nAAs.



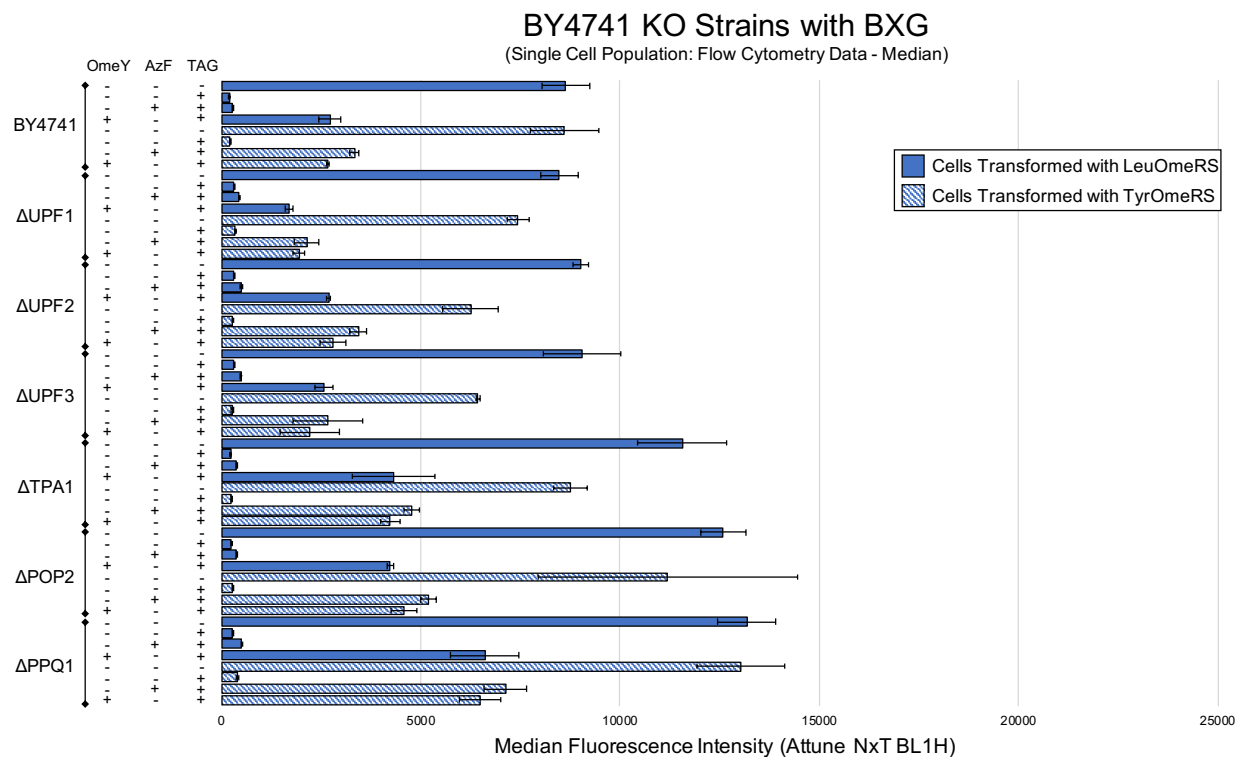

**Fig. S21:** Alternate analysis of BY4741 and six single-gene knockout strains using the BXG BFP-GFP dual-fluorescent protein reporter. Measurements for the efficiency of ncAA incorporation calculated with median fluorescence intensity using single cell population analysis as described in Materials and Methods Section 2.11. The condition denoted by absence of ncAAs and a TAG codon is the wild-type reporter construct induced in the absence of ncAAs.

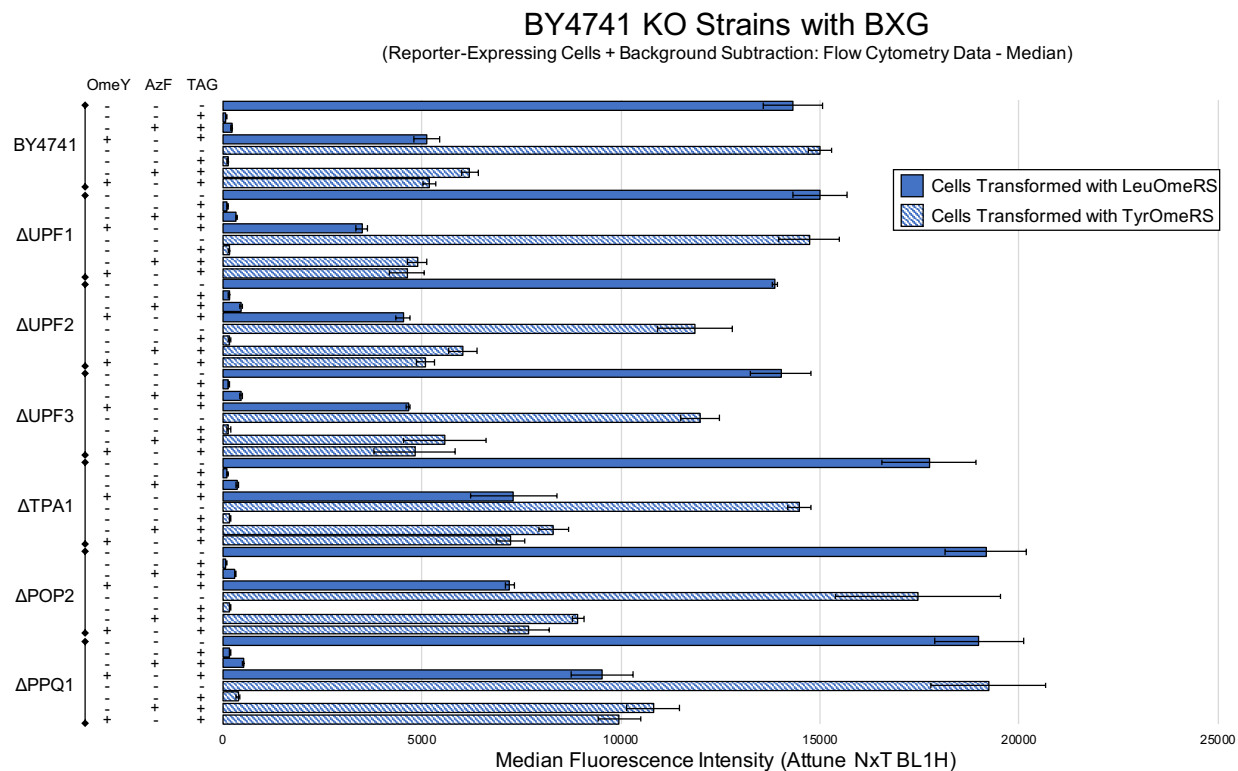

**Fig. S22:** Alternate analysis of BY4741 and six single-gene knockout strains using the BXG BFP-GFP dual-fluorescent protein reporter. Measurements for the efficiency of ncAA incorporation calculated with median fluorescence intensity using reporter-expressing cells with background subtraction. The condition denoted by absence of ncAAs and a TAG codon is the wild-type reporter construct induced in the absence of ncAAs.

## BY4741 KO Strains with BXG

(Reporter-Expressing Cells + BG Subtraction Normalized to WT Reporter: Flow Cytometry Data - Median)

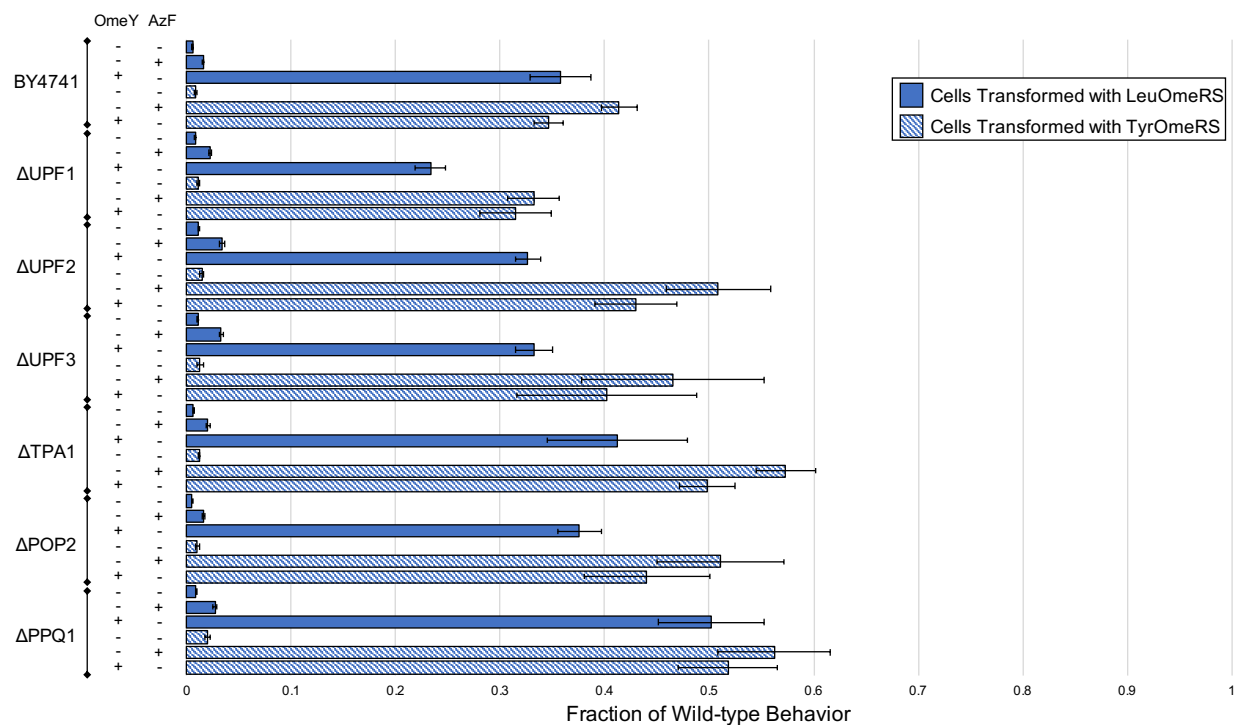

**Fig. S23:** Alternate analysis of BY4741 and six single-gene knockout strains using the BXG BFP-GFP dual-fluorescent protein reporter. Measurements for the efficiency of nCAA incorporation calculated using the median fluorescence intensity of reporter-expressing cells with background subtraction and normalized to expression levels of cells expressing the wild-type reporter induced in the absence of nAAs.

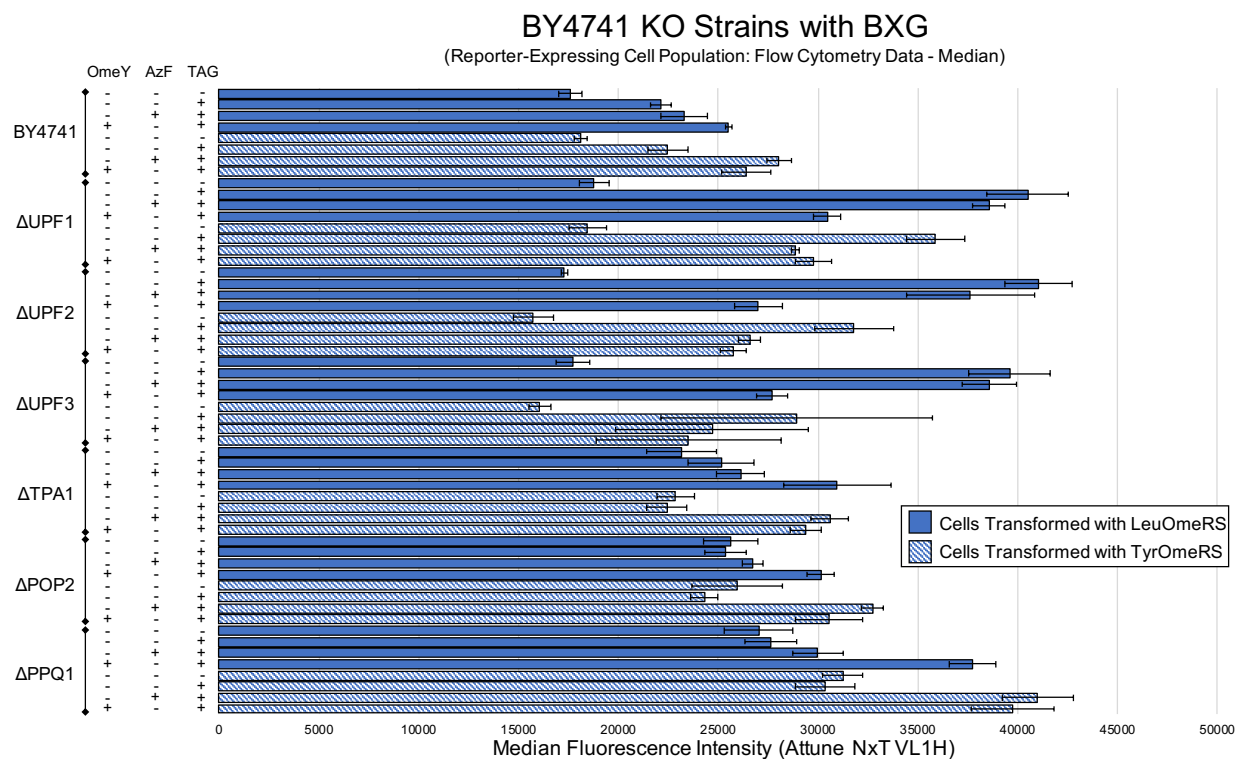

**Fig. S24:** Measurement of reporter expression level in BY4741 and six single-gene knockout strains containing BXG BFP-GFP using the median fluorescence intensity of the cell population exhibiting above-background reporter expression. The condition denoted by absence of ncAAs and a TAG codon is the wild-type reporter construct induced in the absence of ncAAs.

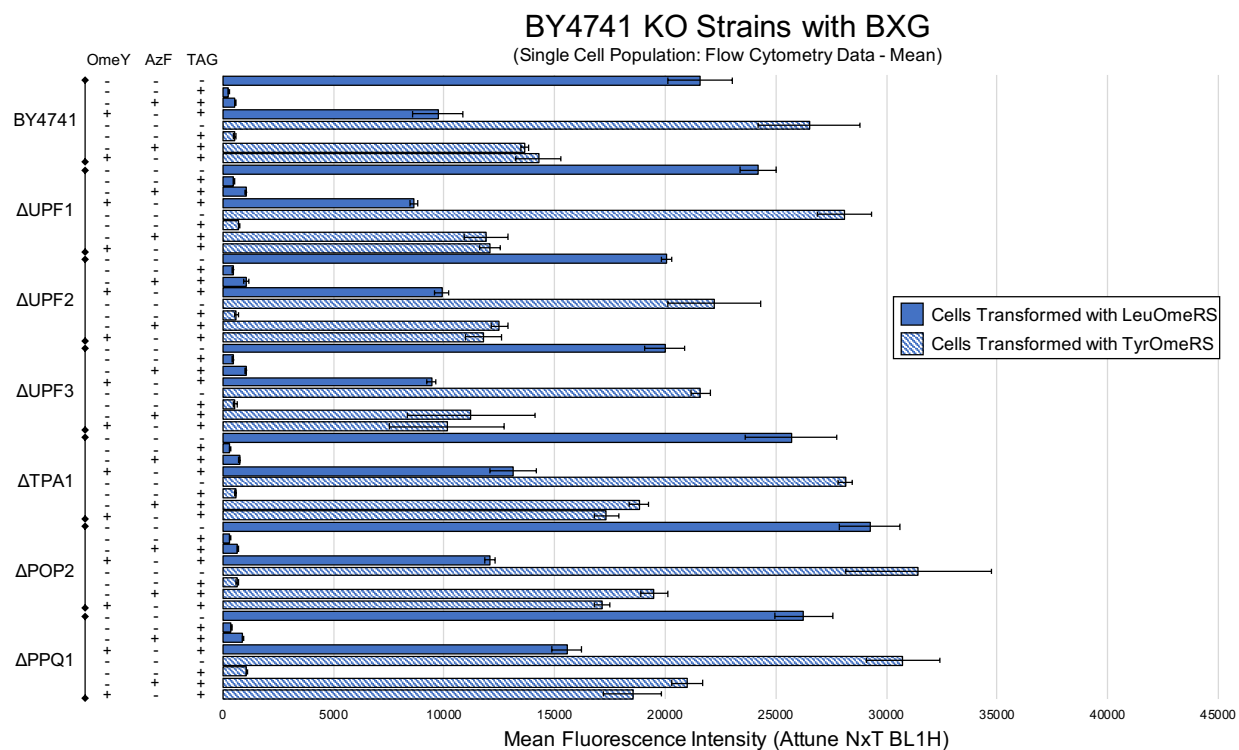

**Fig. S25:** Alternate analysis of BY4741 and six single-gene knockout strains using the BXG BFP-GFP dual-fluorescent protein reporter. Measurements for the efficiency of ncAA incorporation calculated with mean fluorescence intensity using single cell population analysis as described in Materials and Methods Section 2.11. The condition denoted by absence of ncAAs and a TAG codon is the wild-type reporter construct induced in the absence of ncAAs.

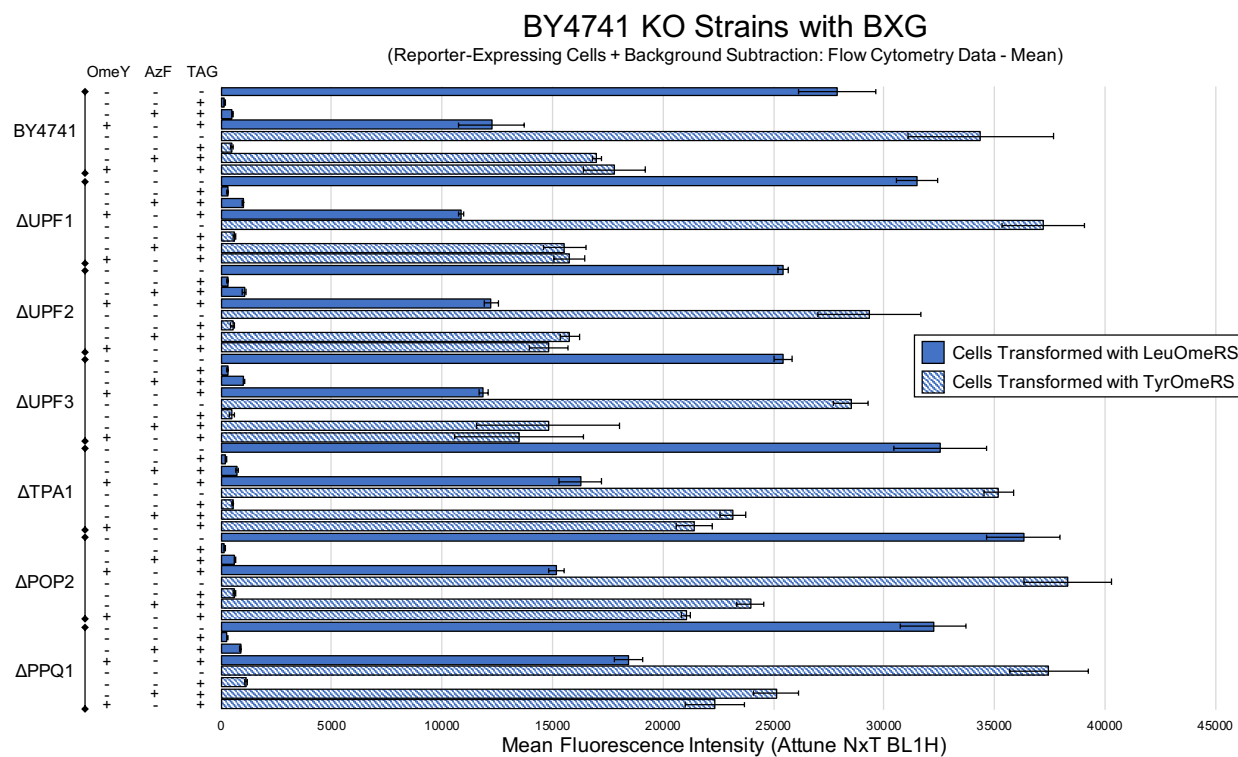

**Fig. S26:** Alternate analysis of BY4741 and six single-gene knockout strains using the BXG BFP-GFP dual-fluorescent protein reporter. Measurements for the efficiency of ncAA incorporation calculated with mean fluorescence intensity using reporter-expressing cells with background subtraction. The condition denoted by absence of ncAAs and a TAG codon is the wild-type reporter construct induced in the absence of ncAAs.

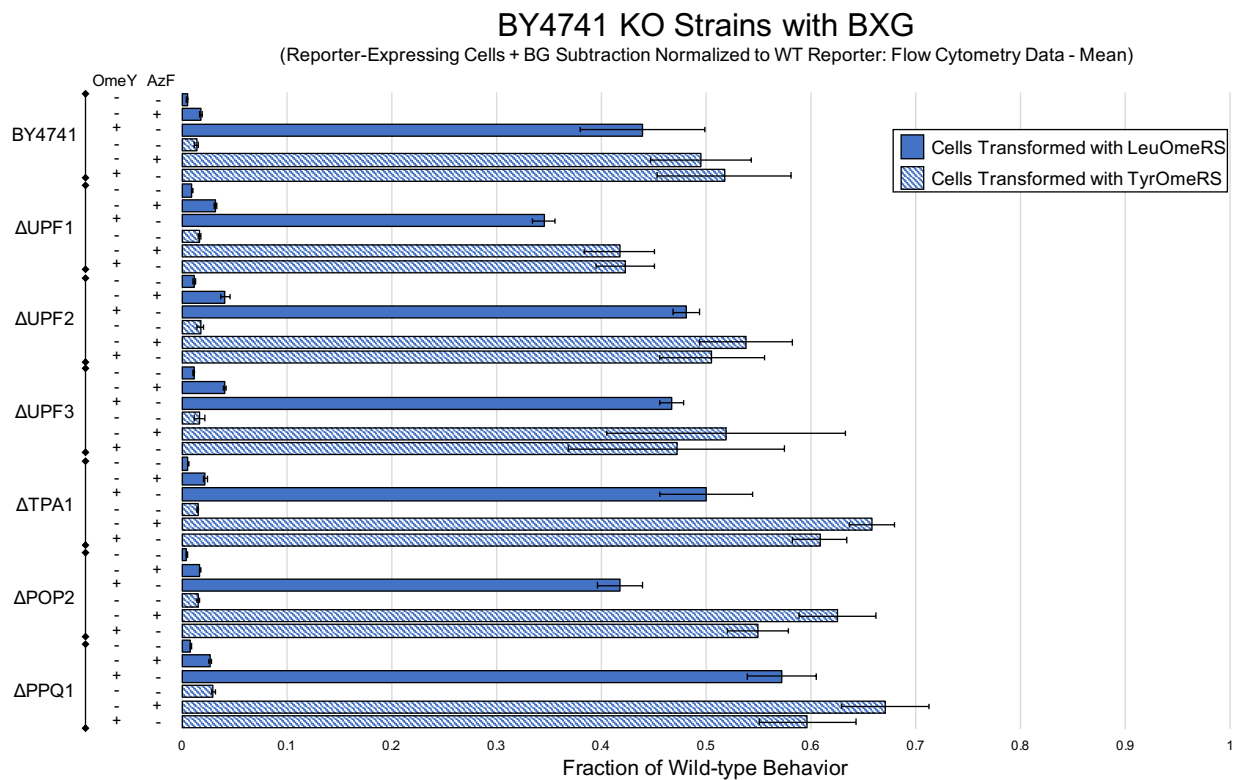

**Fig. S27:** Alternate analysis of BY4741 and six single-gene knockout strains using the BXG BFP-GFP dual-fluorescent protein reporter. Measurements for the efficiency of ncAA incorporation calculated using the mean fluorescence intensity of reporter-expressing cells with background subtraction and normalized to mean expression levels of cells expressing the wild-type reporter induced in the absence of ncAAs.

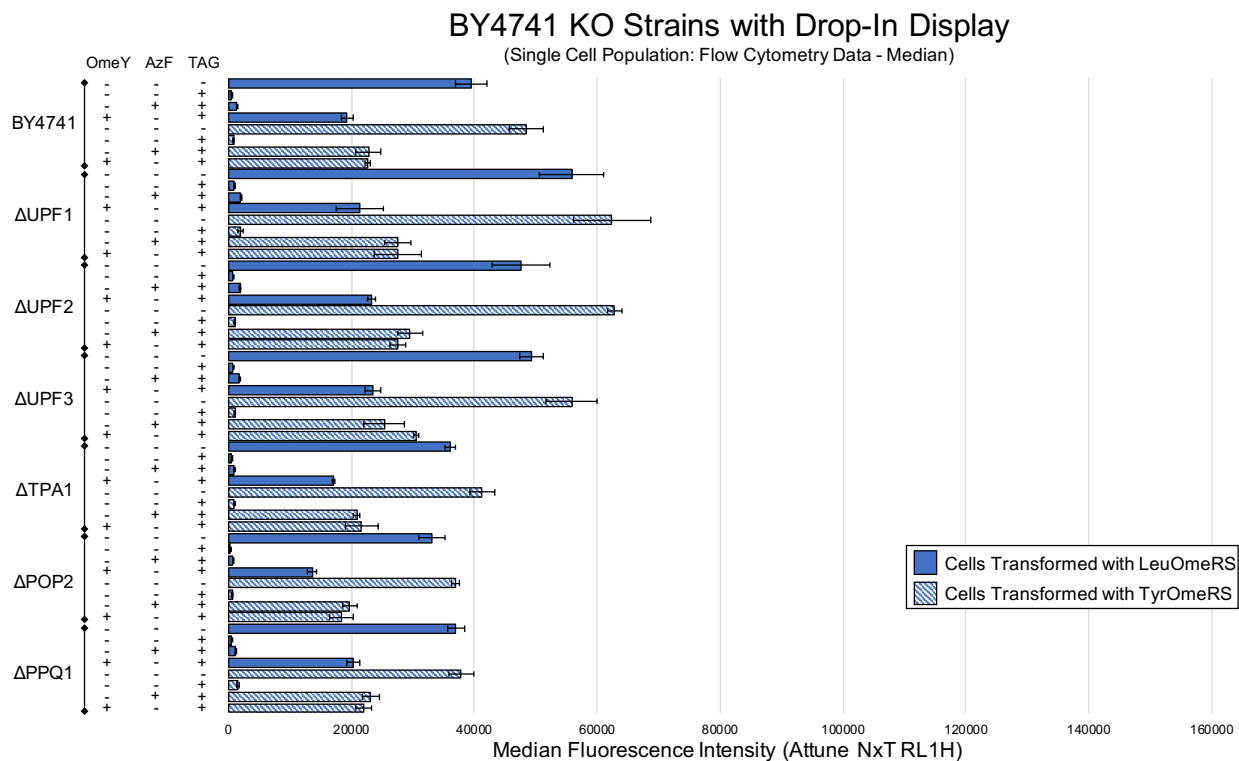

**Fig. S28:** Alternate analysis of BY4741 and six single-gene knockout strains using the drop-in yeast display reporter. Measurements for the efficiency of nCAA incorporation calculated with median fluorescence intensity using single cell population analysis as described in Materials and Methods Section 2.11. The condition denoted by absence of nAAs and a TAG codon is the wild-type reporter construct induced in the absence of nAAs.



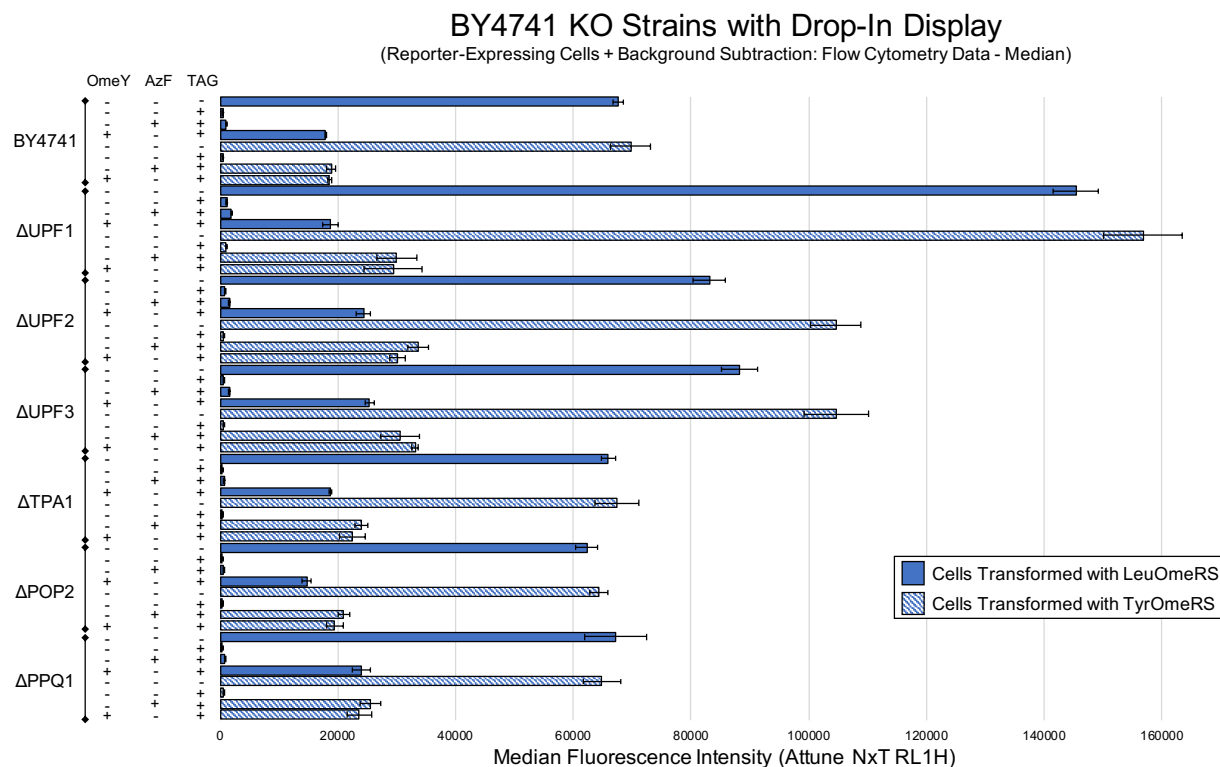

**Fig. S29:** Alternate analysis of BY4741 and six single-gene knockout strains using the drop-in yeast display reporter. Measurements for the efficiency of nCAA incorporation calculated with median fluorescence intensity of reporter-expressing cells with background subtraction. The condition denoted by absence of nAAs and a TAG codon is the wild-type reporter construct induced in the absence of nAAs.

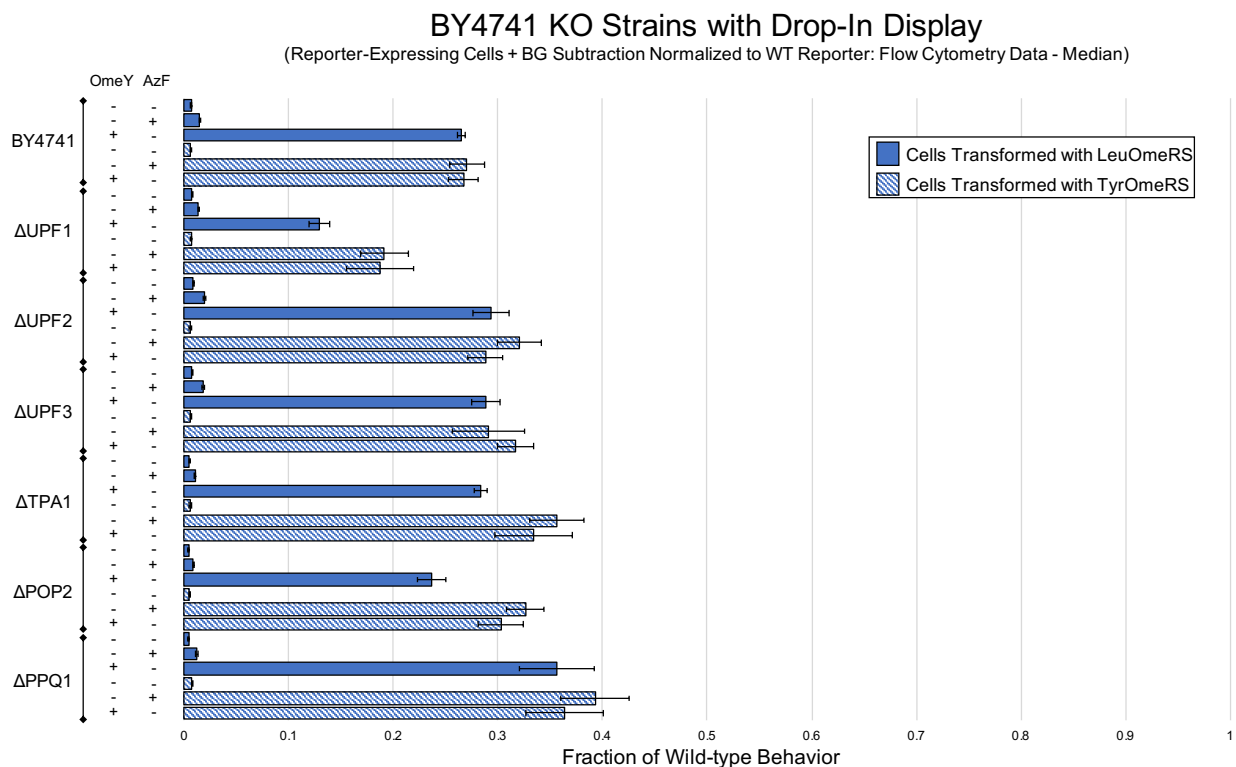

**Fig. S30:** Alternate analysis of BY4741 and six single-gene knockout strains using the drop-in yeast display reporter. Measurements for the efficiency of nCAA incorporation calculated using the median fluorescence intensity of reporter-expressing cells with background subtraction and normalized to expression levels of cells expressing the wild-type reporter induced in the absence of nCAAs.

### BY4741 KO Strains with Drop-In Display

(Reporter-Expressing Cell Population: Flow Cytometry Data - Median)

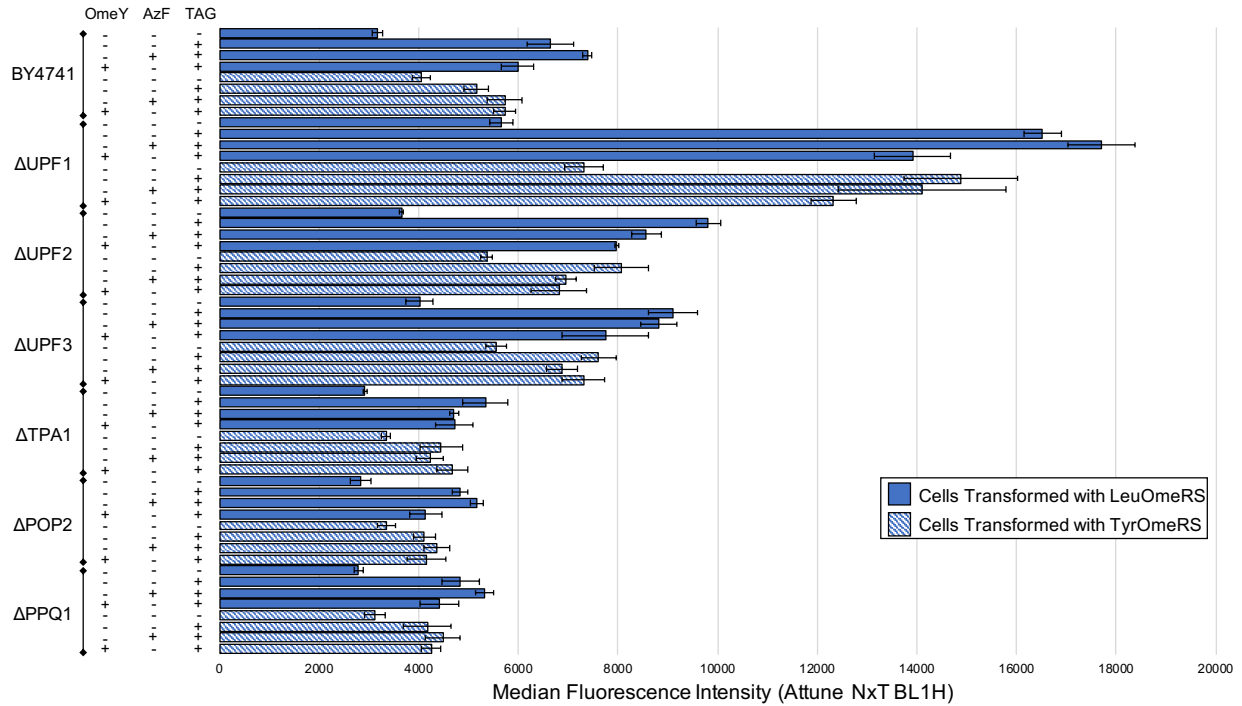

**Fig. S31:** Measurement of reporter expression level in BY4741 and six single-gene knockout strains containing the drop-in yeast display reporter using the median fluorescence intensity of the cell population exhibiting above-background reporter expression. The condition denoted by absence of ncAAs and a TAG codon is the wild-type reporter construct induced in the absence of ncAAs.

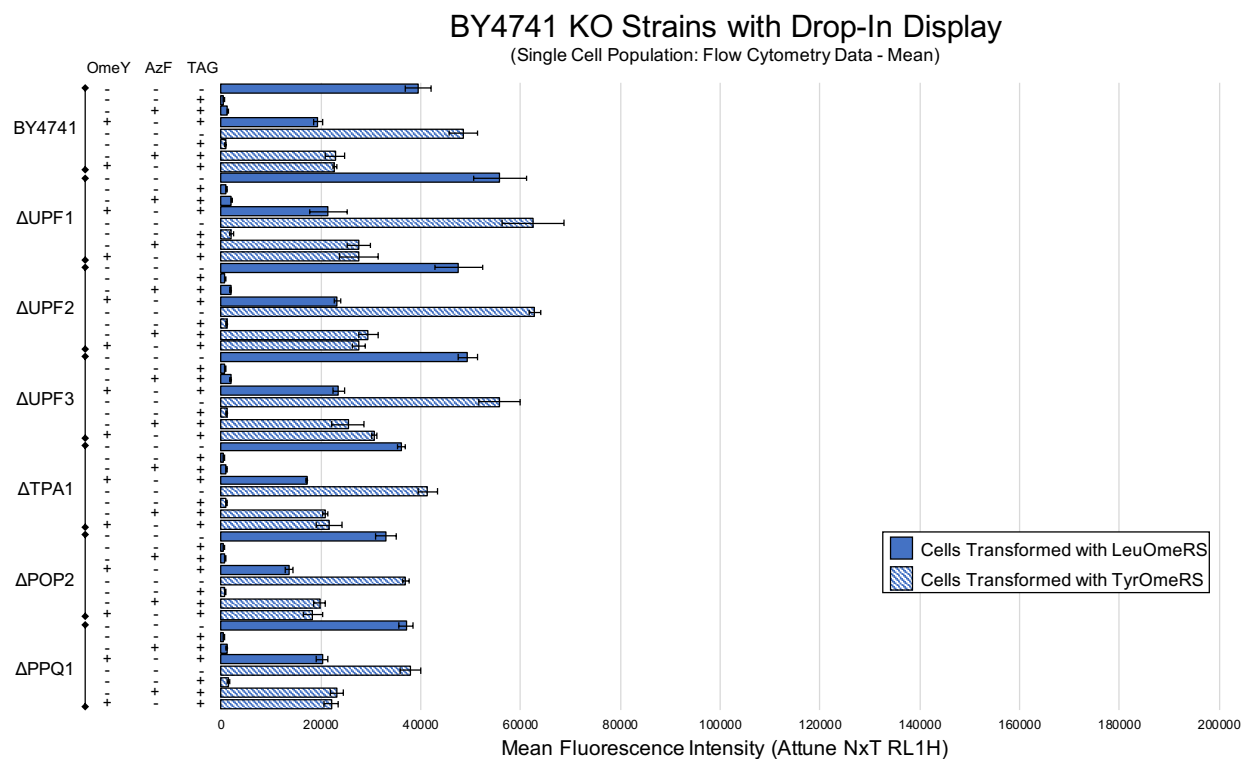

**Fig. S32:** Alternate analysis of BY4741 and six single-gene knockout strains using the drop-in yeast display reporter. Measurements for the efficiency of nCAA incorporation calculated with mean fluorescence intensity using single cell population analysis. The condition denoted by absence of nCAAs and a TAG codon is the wild-type reporter construct induced in the absence of nCAAs.

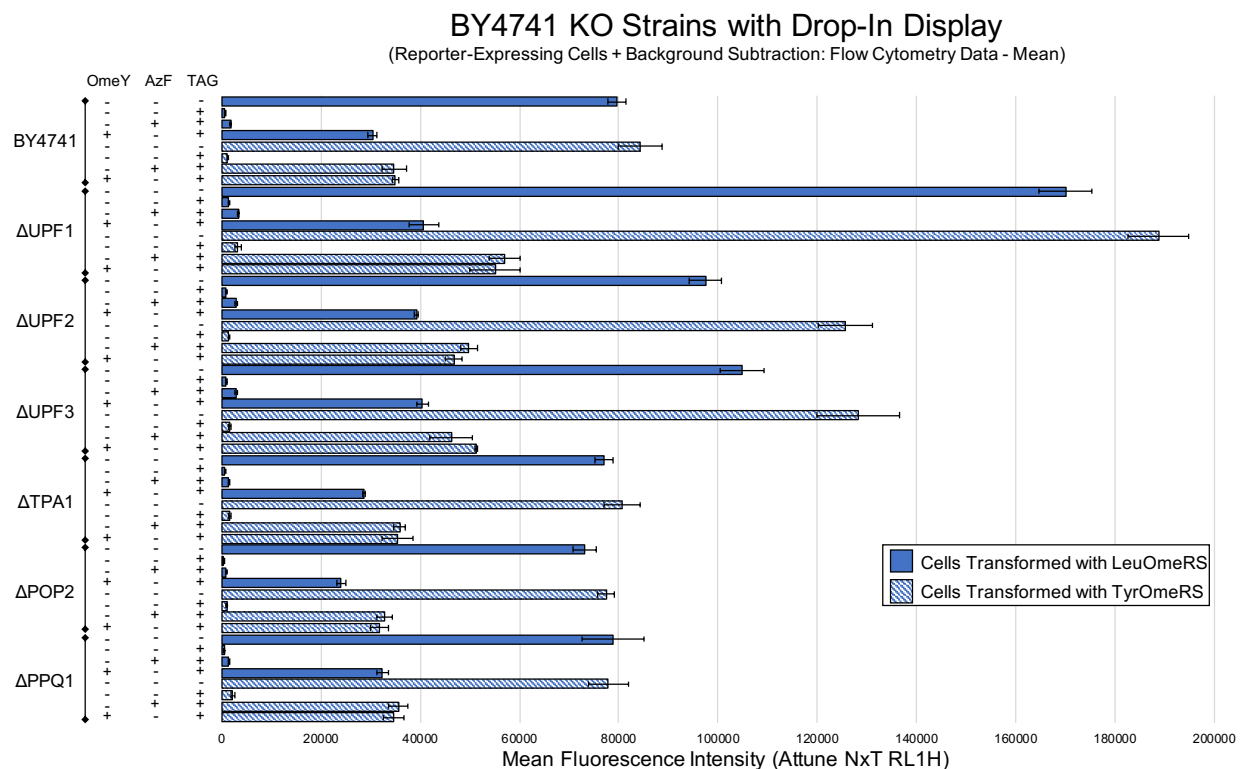

**Fig. S33:** Alternate analysis of BY4741 and six single-gene knockout strains using the drop-in yeast display reporter. Measurements for the efficiency of ncAA incorporation calculated with mean fluorescence intensity using reporter-expressing cells with background subtraction. The condition denoted by absence of ncAAs and a TAG codon is the wild-type reporter construct induced in the absence of ncAAs.

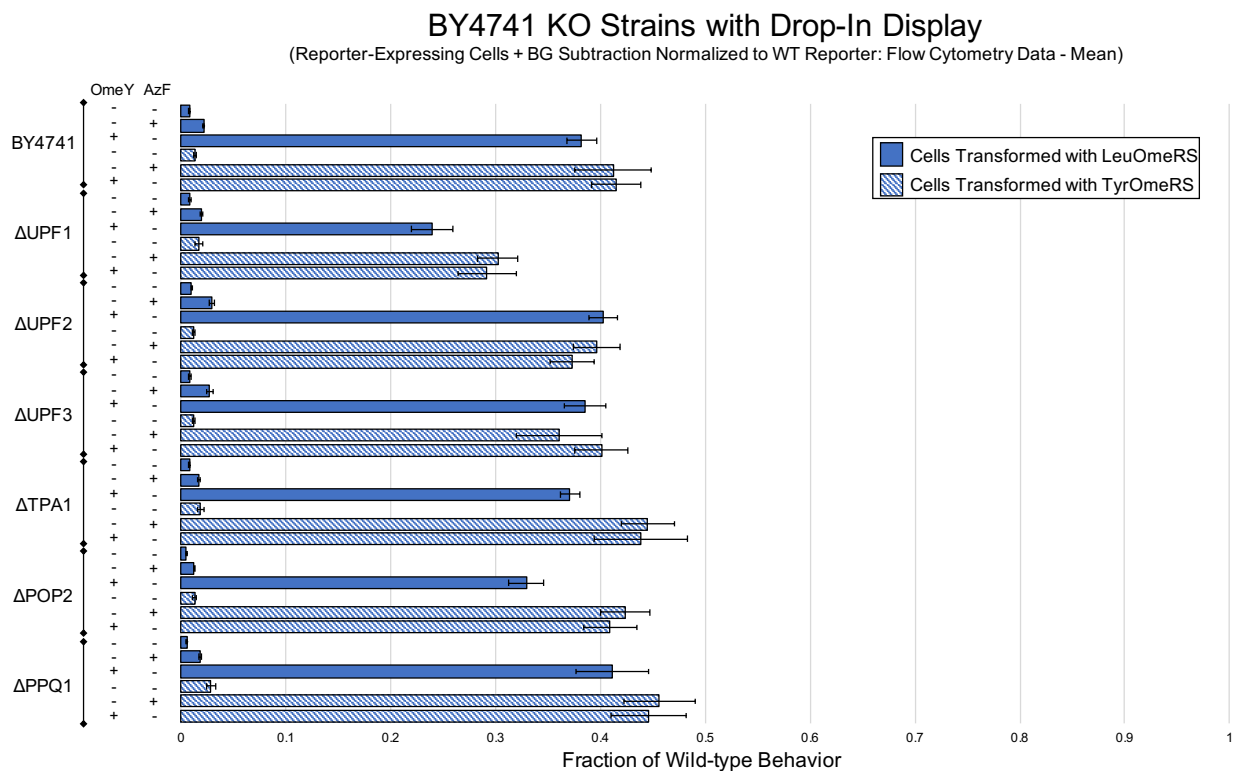

**Fig. S34:** Alternate analysis of BY4741 and six single-gene knockout strains using the drop-in yeast display reporter. Measurements for the efficiency of ncAA incorporation calculated using the mean fluorescence intensity of reporter-expressing cells with background subtraction and normalized to expression levels of cells expressing the wild-type reporter in the absence of ncAAs.
